---

1 **The impact of positive surgical margin parameters and pathological stage on biochemical recurrence**  
2 **after radical prostatectomy: a systematic review and meta-analysis**

3 Hong Guo<sup>1,2&</sup>, Lei Zhang<sup>1&</sup>, Yuan Shao<sup>1&</sup>, Kunyang An<sup>2</sup>, Caoyang Hu<sup>1\*</sup>, Xuezhi Liang<sup>1\*</sup>, Dongwen Wang<sup>2, 3\*</sup>

4 <sup>1</sup> Department of Urology, First Hospital of Shanxi Medical University, Taiyuan, Shanxi, China

5 <sup>2</sup> First College of Clinical Medicine, Shanxi Medical University, Taiyuan, Shanxi, China

6 <sup>3</sup>National Cancer Center/National Clinical Research Center for Cancer/Cancer Hospital & Shenzhen Hospital, Chinese Academy of Medical  
7 Sciences and Peking Union Medical College, Shenzhen, China

8 \*Corresponding author

9 Email: [eryaoer2003@126.com](mailto:eryaoer2003@126.com) ( CH ) ; [liangxz2008@sina.com](mailto:liangxz2008@sina.com) ( XL ) ; [urology2007@126.com](mailto:urology2007@126.com) ( DW )

10 &These authors contributed equally to this work.

11 \*These authors also contributed equally to this work.

12

13 **Abstract**

---

14 **Background:** To systematically review and perform a meta-analysis on the predictive value of the primary Gleason grade (PGG) at the  
15 positive surgical margin (PSM), length of PSM, number of PSMs, and pathological stage of the primary tumor on biochemical recurrence (BCR)  
16 in patients with prostate cancer (PCa) after radical prostatectomy (RP).

17 **Methods:** A systematic literature search was performed using electronic databases, including PubMed, EMBASE, Cochrane Library, and  
18 Web of Science, from January 1, 2005, to October 1, 2023. The protocol was pre-registered in PROSPERO. Subgroup analyses were performed  
19 according to the different treatments and study outcomes. Pooled hazard ratios with 95% confidence intervals were extracted from multivariate  
20 analyses, and a fixed or random effect model was used to pool the estimates. Subgroup analyses were performed to explore the reasons for the  
21 heterogeneity.

22 **Results:** Thirty studies that included 46,572 patients with PCa were eligible for this meta-analysis. The results showed that, compared to  
23 PGG3, PGG4/5 was associated with a significantly increased risk of BCR. Compared with PSM  $\leq 3$  mm, PSM  $\geq 3$  mm was associated with a  
24 significantly increased risk of BCR. Compared with unifocal PSM, multifocal PSM (mF-PSM) was associated with a significantly increased risk  
25 of BCR. In addition, pT  $>2$  was associated with a significantly increased risk of BCR compared to pT2. Notably, the findings were found to be  
26 reliable based on the sensitivity and subgroup analyses.

---

27 **Conclusions:** PGG at the PSM, length of PSM, number of PSMs, and pathological stage of the primary tumor in patients with PCa were  
28 found to be associated with a significantly increased risk of BCR. Thus, patients with these factors should be treated differently in terms of  
29 receiving adjunct treatment and more frequent monitoring. Large-scale, well-designed prospective studies with longer follow-up periods are  
30 needed to validate the efficacy of these risk factors and their effects on patient responses to adjuvant and salvage therapies and other oncological  
31 outcomes.

32  
33 **Keywords:** positive surgical margin, biochemical recurrence, primary Gleason grade, pathological stage, prostate cancer

## 34 35 **Introduction**

36 Prostate cancer (PCa) is the second most common malignancy among men worldwide <sup>[1]</sup>, and radical prostatectomy (RP) is the most effective  
37 treatment for localized PCa <sup>[2]</sup>. The goal of RP is complete prostate extirpation, and despite the favorable cancer control that has been associated  
38 with RP, approximately 20-40% of patients experience biochemical recurrence (BCR) <sup>[3]</sup>. A number of factors have been found to be associated  
39 with BCR after RP, and one important adverse risk factor is the presence of a positive surgical margin (PSM) <sup>[4]</sup>.

---

40 Despite the improvements in surgical techniques, equipment, and staging of newly diagnosed patients with PCa that have been attained  
41 since the introduction of serum prostate-specific antigen (PSA) screening, 11-38% of patients after RP still have PSM [5,6]. Overall, nearly 30%  
42 of the patients with PSM develop BCR, as opposed to approximately 10% of those with negative surgical margins [7-9].

43 Considering the significant effect of PSM on postoperative BCR in patients with PCa, the postoperative margin status is an important  
44 reference index for adjuvant treatment decisions after RP. The European Association of Urology (EAU) and the National Comprehensive Cancer  
45 Network (NCCN) both recommend adjuvant radiotherapy when PSM is present [10,11]. The primary Gleason grade (PGG) prior to PSM, the  
46 length of PSM, number of PSMs, and pathological stage of the primary tumor are very important features of PCa with PSM, but their predictive  
47 value for BCR in the PSM cohort remains controversial. Therefore, to further clarify the effects of these features, we conducted a meta-analysis  
48 of all published epidemiological studies.

49

## 50 **Materials and methods**

### 51 **Protocol and registration**

52 The results of the systematic review and meta-analysis followed the Preferred Reporting Items for Systematic Reviews and Meta-Analyses

---

53 (PRISMA) 2020 statement. The study protocol was registered in PROSPERO database (CRD42021255447). See **Texts S1 and S2** for the  
54 PRISMA Checklist.

55

## 56 **Search strategy**

57 This meta-analysis was conducted in accordance with the Preferred Reporting Items for Systematic Reviews and Meta-analyses (PRISMA)  
58 guidelines. A systematic literature search was performed using electronic databases, including PubMed, EMBASE, and Cochrane Library, from  
59 January 1, 2005, to October 1, 2023. The following terms were used for the literature search: (“prostate cancer” OR “prostatic neoplasms”) AND  
60 (“prostatectomy”) AND (“positive margin” OR “positive surgical margin” OR “surgical margin”). The search strategies used for English  
61 databases are shown in the **S3 Text**.

62

## 63 **Inclusion and exclusion criteria**

64 Eligible studies were determined using the Population, Intervention, Comparator, Outcome and Study design (PICOS) approach. Prospective or  
65 retrospective cohort studies were considered eligible if they investigated PGG at PSM, the length of PSM, PSM focality, and pathologic stage of

---

66 the tumor (C) in patients with PCa with PSMs (P) after RP treatment (I) to assess the independent predictors of BCR (O) using multivariate Cox  
67 regression analysis (S).

68 We excluded reviews, meeting abstracts, case reports, editorials, replies from the authors, letters, and studies without sufficient data. In the  
69 case of duplicate publications, either the higher quality or the most recent publication was selected. The references of the included reports were  
70 scanned for additional studies. Any disagreements were resolved by discussion with a third investigator.

71

## 72 **Data extraction**

73 Two investigators (HG and YS) independently extracted information from the eligible studies. The following data were extracted: first author's  
74 name, publication year, recruitment country, recruitment period, age, PSA level, number of patients, number of patients with positive surgical  
75 margins, follow-up duration, and BCR rate. All discrepancies in data extraction were resolved by discussion between the two reviewers or by  
76 consultation with a third reviewer (LZ).

77

## 78 **Quality assessment**

---

79 The Newcastle-Ottawa Scale (NOS) was used to assess the quality of the enrolled nonrandomized studies. Each study was assessed using eight  
80 methodological items, with scores ranging from 0 to 9. Studies with scores of six or higher were graded as high quality. Only high-quality  
81 studies were included in further analysis, to ensure the quality of the meta-analysis.

82

### 83 **Statistical analysis**

84 Pooled hazard ratios (HRs) with 95% confidence interval (CIs) were used to evaluate the association between the PGG at PSM, length of PSM,  
85 number of PSMs, and pathological stage of the primary tumor. Heterogeneity between studies was evaluated using Cochran's Q test and the I<sup>2</sup>  
86 statistic. An I<sup>2</sup> >50% or p-value < 0.1, as determined by Cochran's Q test, implies that heterogeneity exists. We used a random-effects (RE)  
87 model to calculate the pooled HRs for heterogeneous results; otherwise, a fixed-effects (FE) model was adopted. A sensitivity analysis was  
88 performed by sequentially excluding each study, to test the reliability of the pooled results. In addition, the presence of publication bias was  
89 evaluated using both the funnel plot and Egger's test. A meta-analysis was performed using the Review Manager software (version 5.3) and  
90 STATA 12.0. Statistical significance was set at P < 0.05.

91

---

## 92 Results

### 93 Search results

94 A total of 6,370 potential studies were retrieved and screened according to the retrieval requirements. After duplicates were removed, 4,658  
95 papers remained. After screening, 30 English articles were included in the present meta-analysis, which did not contain any topics, reviews, case  
96 reports, republications, or research purposes that were inconsistent with this meta-analysis. Fig. 1 presents the flowchart of the study selection  
97 process.

98 **Fig.1 Flowchart of the literature review process for the selection of eligible literatures.**

99

### 100 Study characteristics and quality assessments

101 The detailed characteristics of the included studies are listed in Table 1.

**Table 1. Characteristics of the included studies**

| Authors         | Year | Country | Recruitment period | Mean*/Median Age (years) | PSA (ng/ml)  | PSMs/total patients | Mean*/median follow-up, years (Range) | BCR rate          |
|-----------------|------|---------|--------------------|--------------------------|--------------|---------------------|---------------------------------------|-------------------|
| Sasaki et al.   | 2023 | Japan   | 2012-2021          | 68 (40-83)               | 7.6 (0.7-90) | 798/2667            | 25.0 months                           | 13.5%             |
| Preisser et al. | 2019 | Germany | 2010-2016          | 64.6 (58.8-68.7)         | 8 (5.7-11.2) | 579/8770            | Mean 6 years                          | PSM22.3%; NSM 11% |



|                          |      |             |           |                  |                 |           |                         |                    |
|--------------------------|------|-------------|-----------|------------------|-----------------|-----------|-------------------------|--------------------|
| <b>Viers et al.</b>      | 2014 | USA         | 1996-2002 | 63 (IQR58-68)    | 6.8 (5-10.1)    | 338/1036  | 13 (IQR11-15) years     | PSM 50%; NSM 32.8% |
| <b>Chapin et al.</b>     | 2017 | USA         | 2002-2011 | 59 (40-71)       | 5.8 (1.2-24.6)  | 200/400   | 5.4 (1.03-10.9) years   | PSM30%; NSM10%     |
| <b>Savdie et al.</b>     | 2011 | USA         | 1997-2003 | 61.7 (46.4-81)   | 8.7 (2-63)      | 285/940   | 6.8 (0.42-12.2) years   | PSM 29%            |
| <b>Huang et al.</b>      | 2013 | Australia   | 2003-2011 | NR               | 7.1 (5.7-10)    | 238/1048  | 1.5 (0.7-2.4) years     | PSM28.8%; NSM9.6%  |
| <b>Lee et al.</b>        | 2020 | South Korea | 2010-2013 | 66.23±6.96       | 13.45±13.51     | 74/150    | 41.46±6.49 months       | 35.3%              |
| <b>Dason et al.</b>      | 2021 | USA         | NR        | 59 (55-64)       | 5.1 (3.7-7.0)   | 205/2147  | 5.6 (IQR4.0-7.3) years  | 10.7%              |
| <b>Ginzburg et al.</b>   | 2012 | USA         | 2003-2009 | 59.3±6.5         | 5.9±4.4         | 316/1159  | 15.9 (13.4) months      | 28%                |
| <b>Kozal et al.</b>      | 2015 | France      | 2005-2013 | 62.3±6.9         | 8.39±6.1        | 114/742   | Mean 31.4 months        | 10.8%              |
| <b>Ploussard et al.</b>  | 2014 | France      | 2005-2011 | 62.7 (58.1-67.7) | 7.0 (5-10)      | 402/1504  | 30 (19-44) months       | PSM25.3%; NSM6.4%  |
| <b>Dev et al.</b>        | 2015 | England     | 2002-2013 | NR               | NR              | 486/4001  | > 3 years               | PSM 37%; NSM10%    |
| <b>Kordan et al.</b>     | 2009 | USA         | 2000-2008 | NR               | NR              | 372/1667  | Mean 21.1 months        | PSM21.5%; NSM 5.3% |
| <b>Godoy et al.</b>      | 2009 | USA         | 2000-2006 | 58.42±0.19       | 6.37±0.14       | 128/1308  | 33.5 (20.1) months      | PSM32.8%           |
| <b>Resnick et al.</b>    | 2010 | USA         | 1988-2007 | 59.5±6.7         | 10.3±13.8       | 423/2410  | Mean 59.7 months        | 30.7%              |
| <b>Porpiglia et al.</b>  | 2011 | Italy       | 2000-2009 | 64 (47-75)       | 7 (2.2-28)      | 68/300    | 62 (12-118) months      | PSM33.4%; NSM11.2% |
| <b>Somford et al.</b>    | 2011 | Netherlands | 1980-2006 | 63.8±6.9         | 11.7±9.7        | 249/1009  | 40 (0-258) months       | PSM41%; NSM12%     |
| <b>Lee et al.</b>        | 2013 | Korea       | 2005-2011 | 67.9±5.7         | 11.2±10.4       | 167/367   | 22 (8-41) months        | PSM47.3%; NSM11%   |
| <b>Song et al.</b>       | 2017 | Korea       | 2006-2014 | 67 (37-81)       | 13.70±12.30     | NR/795    | 58.8 (2.9-172.3) months | 34.5%              |
| <b>Wu et al.</b>         | 2018 | USA         | 1993-2007 | 60 (55-65)       | 5.9 (4.6-9.0)   | 476/2796  | 12.9 (9.8-16.7) years   | 46.4%              |
| <b>Simon et al.</b>      | 2006 | USA         | 1992-2003 | 60.6±7.4         | 7.4±5.4         | 350/936   | Mean 45.8 months        | PSM19%; NSM7%      |
| <b>Stephenson et al.</b> | 2009 | USA         | 1995-2006 | 60 (55-65)       | 5.8 (4.4-8.1)   | 1501/7160 | 38 (IQR14-71) months    | NR                 |
| <b>May et al.</b>        | 2011 | Germany     | 1993-2007 | 63.7 (44-79)     | 10.9 (0.1-132)  | 267/1036  | 52 (1-156) months       | PSM41%; NSM20%     |
| <b>Lian et al.</b>       | 2020 | China       | 2014-2018 | 68 (62-72)       | 15.8 (8.8-29.8) | 132/416   | 27 (20-47) months       | PSM36.4%; NSM16.2% |
| <b>Oort et al.</b>       | 2010 | Netherlands | 1995-2005 | NR               | 8.7 (0.1-87.2)  | NR/267    | 26 (0-141) months       | PSM29%             |
| <b>Richters et al.</b>   | 2015 | Netherlands | 2006-2008 | Median 63        | 11 (8-13)       | 253/648   | 4.9 (4.1-5.7) years     | 16%                |
| <b>Keller et al.</b>     | 2018 | Switzerland | 2005-2016 | 64 (59-68)       | 7.3 (5.0-19.4)  | 315/973   | 52 (15-72) months       | 14%                |
| <b>Karl et al.</b>       | 2015 | Germany     | 1994-2013 | 64 (40-79)       | NR              | NR/956    | Mean 48 months          | 25.4%              |

---

|                             |      |        |           |                |                |         |                        |          |
|-----------------------------|------|--------|-----------|----------------|----------------|---------|------------------------|----------|
| <b>Iremashvili et al.</b>   | 2018 | USA    | 1997-2011 | 62.6 (57-67.2) | 7 (IQR4.9-9.8) | 276/795 | 4.8 (IQR1.8-6.8) years | PSM35.5% |
| <b>Porcaro et al.</b>       | 2019 | Italy  | 2013-2017 | 65 (60-69)     | 6.3 (4.9-8.7)  | 192/732 | 26 (14-40) months      | 8.7%     |
| <b>Sooriakumaran et al.</b> | 2015 | Sweden | 2002-2006 | NR             | NR             | 189/893 | NR                     | NR       |

---

102

103 A total of 46,572 patients (range, 150–8770) with localized PCa after radical prostatectomy were included, in which the PSM samples  
 104 ranged from 68 to 1,501 (of which 9,836 patients were reported to have PSMs). All 30 studies were retrospective in design, the time of  
 105 publication ranged from 2006 to 2023, and the mean follow-up durations varied from 1.5 to 13 years. Among the studies, nine<sup>[9,12-19]</sup>, six<sup>[17,20-24]</sup>,  
 106 14<sup>[12,17,20,23-33]</sup> and, 13<sup>[23,26-28,30,33-40]</sup> studies evaluated the relationships between PGG, PSM length, number of PSMs, pathologic stage of the  
 107 tumor, and BCR, respectively.

108 NOS scores ranged from 6 to 9, indicating a moderate to high quality of the included studies (**S1 Table**).

109

## 110 **Meta-analysis**

111 Our meta-analysis included all studies that analyzed the relationship between PGG at PSM, the length of PSM, the number of PSMs, pathologic  
 112 stage of the tumor, and BCR in patients with PCa. Subgroup analyses were conducted according to PGG at PSM.

---

113

114 **Primary Gleason grade of the positive surgical margin**

115 Nine studies including 16,242 patients with PCa compared their BCR between PGG3 and PGG4/5, with HRs with 95% CIs from the  
116 multivariate analysis (Table 1). The pooled results, based on the FE model, indicated that compared to PGG3, PGG4/5 was associated with a  
117 significantly increased risk of BCR (pooled HR 1.61; 95% CI: 1.34-1.93,  $P < 0.001$ ,  $I^2 = 45\%$ ; Fig. 2A). A sensitivity analysis was performed by  
118 excluding one study at a time, and the results showed that the combined HRs ranged from 1.51 (95% CI: 1.24-1.83) to 1.73 (95% CI: 1.39-2.16)  
119 (S1 Fig). Furthermore, the sensitivity analysis did not find any studies that significantly affected heterogeneity (Additional file 1), and the funnel  
120 plot did not identify any specific study over the pseudo 95% CI (Fig. 3A). These results indicate that the findings are reliable.

121 **Fig. 2 Forest plots of included studies evaluating the association between (A) PGG and BCR, (B)&(C) length of PSM (D) number of**  
122 **PSM in PCa patients.**

123 **Fig. 3 Funnel plots of (A) PGG and BCR, (B)&(C) length of PSM (D) number of PSM and BCR.**

124

125 **Length of positive surgical margin**

---

126 Six studies that included 8,592 patients with PCa compared BCR based on the length of PSM <3 mm and PSM ≥3 mm or PSM ≤3 mm and  
127 PSM >3 mm, with HR and 95% CIs determined from multivariate analysis (Table 1). Four studies that included 6,397 patients with PCa were  
128 classified according to PSM <3 mm and PSM ≥3 mm. The pooled results, based on the random effects model, indicated that compared to PSM <  
129 3 mm, PSM ≥3 mm was associated with a significantly increased risk of BCR (pooled HR 1.68; 95% CI, 1.22-2.30, P=0.001, I<sup>2</sup>=59%; Fig. 2B).  
130 Furthermore, the sensitivity analysis showed a significant decrease in heterogeneity (I<sup>2</sup>=0%, P <0.001), after excluding the study by Kozal et al.  
131 (Additional File 2). Moreover, the funnel plot identified this study over the pseudo 95% CI (Fig. 3B). After excluding this study, the  
132 recalculation results showed a significant correlation between PSM length and BCR without heterogeneity (pooled HR: 2.01, 95% CI: 1.5–2.63;  
133 P <0.001; I<sup>2</sup> = 0%; S2 Fig).

134 Because the classification methods differ, two articles including 2,195 patients with PCa were classified according to PSM ≤3 mm or >3  
135 mm. The pooled results, based on the FE model, indicated that compared to PSM <3 mm, PSM ≥3 mm was associated with a significantly  
136 increased risk of BCR (pooled HR: 1.11; 95% CI: 0.78-1.58, P =0.57, I<sup>2</sup> = 0%; Fig. 2C).

137

### 138 **Focality of positive surgical margin**

---

139 Next, we evaluated the relationship between multifocal PSM (mF-PSM) and unifocal PSM, with HR and 95% CIs determined from a  
140 multivariate analysis. Fourteen studies with 34,194 patients were evaluated (Table 1). The pooled results, based on the FE model, indicated that  
141 compared to unifocal PSM, mF-PSM was associated with a significantly increased risk of BCR (pooled HR 1.38; 95% CI: 1.22-1.55,  $P < 0.001$ ,  
142  $I^2 = 0\%$ ; Fig. 2D). A sensitivity analysis was performed by excluding one study at a time, and the results showed that the combined HRs ranged  
143 from 1.33 (95% CI: 1.18-1.51) to 1.40 (95% CI: 1.23-1.6) (Additional file 3). In addition, the sensitivity analysis did not find a single study that  
144 significantly affected heterogeneity (Additional file 3), and the funnel plot did not identify any study with a pseudo 95% CI (Fig. 3D). These  
145 results indicate that our findings are robust.

146

### 147 **Pathologic stages of the PSM cohort**

148 Thirteen studies that included 13,637 patients with PCa compared BCR values between different pathological stages, with HRs and their 95%  
149 CIs from a multivariate analysis (Table 1). Five studies included 4,502 patients and compared their BCR between pT3 and pT2. The pooled  
150 results, based on the random effects model, indicated that compared to pT2, pT3 was associated with a significantly increased risk of BCR  
151 (pooled HR: 1.66; 95% CI: 1.06-2.6,  $P < 0.001$ ,  $I^2 = 67\%$ ; Fig. 4A). Moreover, the funnel plot identified two articles with a pseudo 95% CI (Fig.

---

152 5A). Due to the high heterogeneity, we further conducted a subgroup analysis.

153 **Fig. 4 Forest plots of included studies evaluating the association between (A) pT2 and pT3, (B) pT2 and pT3a, (C) pT2 and pT3b, (D)**  
154 **pT2 and pT3/4.**

155 **Fig. 5 Funnel plots of included studies evaluating the association between pathologic stage of the PSM (A) pT3 and pT2, (B) pT3a and**  
156 **pT2, (C) pT3b and pT2, (D) pT3/4 and pT2.**

157 Next, we evaluated the relationship between pT3a and pT2 using HRs and 95% CIs and included five studies with 4,718 patients. The  
158 results showed that based on the FE model, the pooled results indicated that compared to pT2, pT3a was associated with a significantly increased  
159 risk of BCR (pooled HR: 1.97; 95% CI: 1.52-2.55;  $P < 0.001$ ;  $I^2 = 35\%$ ; Fig. 4B). A sensitivity analysis was also conducted, in which one study  
160 was removed at a time, and the results showed that the combined HRs ranged from 1.61 (95% CI: 1.14-2.28) to 2.15 (95% CI: 1.62-2.84)  
161 (Additional file 4). Notably, the funnel plot analysis did not identify any study with a pseudo 95% CI (Fig. 5B), which indicates that our findings  
162 are reliable.

163 Furthermore, two studies that included 1,625 patients assessed the association between pT3b and pT2. The synthesized analysis showed  
164 that, compared to pT2, pT3b was associated with a significantly increased risk of BCR (pooled HR: 2.87; 95% CI: 1.65-5.00,  $P < 0.001$ ,  $I^2 = 0\%$ ;

---

165 Fig. 4C). Furthermore, no studies with a pseudo 95% CI were found in the funnel plot analysis (Fig. 5C).

166 We evaluated the relationship between pT3/4 and pT2 using HR and 95% CIs and included three studies with 4,417 patients. The random-  
167 effects model results showed that compared to pT2, pT3/4 was associated with a significantly increased risk of BCR (pooled HR: 1.90; 95% CI:  
168 1.15-3.12,  $P < 0.001$ ,  $I^2 = 84\%$ ; Fig. 4D). The sensitivity analysis showed that heterogeneity was evidently reduced ( $I^2 = 0\%$ ,  $P < 0.001$ ; Additional  
169 file 5) after excluding the study by Kellerl et al. The pooled HR, recalculated using the FE model, was 1.46 (95% CI: 1.17-1.81,  $P < 0.001$ ;  
170 Additional file 5). Moreover, the funnel plot identified it over the pseudo 95% CI (Fig. 5D).

171

## 172 **Subgroup analysis**

173 Our results confirmed that PGG at PSM was associated with a significantly increased risk of BCR, based on nine studies. However, the  
174 heterogeneity remained significant after the sensitivity analysis. As different study features were involved, we further performed a subgroup  
175 analysis to explore the source of this heterogeneity (Table 2). Collectively, the results of the subgroup analyses indicated that the median age,  
176 region, sample size, and median follow-up months did not affect the relationship between PGG and BCR in patients with PCa, whereas the  
177 sample size and median age could be a potential source of heterogeneity.

**Table 2 Subgroup analysis for primary Gleason grade (PGG) at PSM.**

| Subgroup                                | No. of studies | No. of patients | HR (95% CI)      | P value | Heterogeneity      |      | Effect model |
|-----------------------------------------|----------------|-----------------|------------------|---------|--------------------|------|--------------|
|                                         |                |                 |                  |         | I <sup>2</sup> (%) | Ph   |              |
| <b>Overall</b>                          | 9              | 16242           | 1.61 (1.34-1.93) | <0.001  | 45%                | 0.07 | fixed        |
| <b>Region</b>                           |                |                 |                  |         |                    |      |              |
| <b>Europe</b>                           | 8              | 16092           | 1.57 (1.3-1.9)   | <0.001  | 48%                | 0.06 | fixed        |
| <b>Asia</b>                             | 1              | 150             | -                | -       | -                  | -    | -            |
| <b>Sample size</b>                      |                |                 |                  |         |                    |      |              |
| <b>&lt;1000</b>                         | 5              | 3241            | 1.93 (1.45-2.58) | <0.001  | 43%                | 0.13 | fixed        |
| <b>≥1000</b>                            | 4              | 13001           | 1.33 (1.04-1.71) | 0.02    | 0%                 | 0.5  | fixed        |
| <b>Median age (years)</b>               |                |                 |                  |         |                    |      |              |
| <b>≥63</b>                              | 4              | 10912           | 1.36 (1.06-1.74) | 0.01    | 0%                 | 0.47 | fixed        |
| <b>&lt;63</b>                           | 5              | 4282            | 2.36 (1.73-3.23) | <0.001  | 0%                 | 0.49 | fixed        |
| <b>Median time of follow-up (years)</b> |                |                 |                  |         |                    |      |              |
| <b>&lt;4.8</b>                          | 3              | 2154            | 1.32 (0.95-1.85) | 0.1     | 20%                | 0.29 | fixed        |
| <b>≥4.8</b>                             | 6              | 14088           | 1.74 (1.4-2.17)  | <0.001  | 50%                | 0.07 | fixed        |

178

## 179 **Publication Bias**

180 According to the funnel plot analysis, most of the studies were located at the upper part of the "inverted funnel" with a roughly symmetrical  
181 distribution, which indicated that the included studies had no significant publication bias. Publication bias was also assessed using Egger's test.  
182 The results showed no significant publication bias in PGG (P = 0.215), length of PSM (P=0.052), PSM focality (P=0.815), and pathologic stage  
183 of the tumor (P=0.155, 0.075, 0.556, respectively), indicating the robustness of the results.



---

184

185 **Discussion**

186 Due to the influence of prostate anatomy and other factors, the positive rate of surgical margins after RP ranged as high as 11% to 38%, ranking  
187 first among malignant tumors in men <sup>[5,6]</sup>. Prior studies have shown that PSM is associated with BCR after RP, and the EAU and NCCN  
188 recommend adjuvant radiotherapy for RP patients with PSM after RP <sup>[10,11]</sup>. However, because the side effects of radiotherapy and the effect of  
189 radiotherapy on patient long-term survival have not been determined <sup>[41,42]</sup>, the proportion of patients with PSM who actually received adjuvant  
190 radiotherapy after surgery was relatively low <sup>[43]</sup>.

191 To identify patients with different risks of BCR and to more accurately select patients who have the greatest opportunity to benefit from  
192 postoperative therapy, it is necessary to perform risk stratification in the study patients with PSM. Notably, this may limit potential  
193 overtreatment and reduce medical costs. Due to differences in genetic and environmental background, detection means, operation methods, and  
194 surgical techniques, the prognosis of PCa heterogeneity cannot be fully elucidated. Only multicenter studies that include a large number of  
195 events involving different genetic or environmental backgrounds can reasonably evaluate the factors in predicting clinical outcomes in the PSM  
196 cohort. Thus, the aim of our systematic review and meta-analysis of 30 studies involving 46,572 patients with PSM (21.1%) was to summarize

---

197 and analyze the current evidence regarding the predictive value of the PSM parameters and primary tumor pathological stage on BCR in patients  
198 with PCa. The results showed that compared to PGG3, PSM < 3 mm, single PSM focality, lower pathologic stage, PGG ≥ 3, PSM ≥ 3 mm,  
199 multiple PSM focality, and higher pathologic stage were associated with a significantly increased risk of BCR. The sensitivity and subgroup  
200 analyses further revealed the reliability and rationality of our findings. Collectively, the pooled data from this meta-analysis confirmed that the  
201 PGG at the PSM, its length, PSM focality, and pathologic stage of the tumor could predict clinical outcomes and may serve as reliable  
202 prognostic indicators for patients with PCa complicated with PSM after RP treatment.

203         The Gleason score of the primary tumor is known to be an extremely important pathological parameter of PCa and was found to be  
204 significantly associated with BCR [13,18,19,44,45]. However, the predictive value of the Gleason score in PSM remains controversial [9,13,16-18,45].  
205 Hollemans et al. [45] found that up to 54% of the Gleason grade of tumors at the PSM differed from that of primary tumors. Notably, the Gleason  
206 grade of tumors at the PSM was found to be even better than the Gleason grade of the primary tumor in predicting BCR in the multivariate  
207 analysis. We performed a meta-analysis of nine studies involving 16,242 patients with PCa, and the pooled results showed that PGG4 or 5 was  
208 associated with a significantly increased risk of BCR compared to PGG3. However, after the sensitivity analysis, heterogeneity remained  
209 significant. Because different study characteristics were involved, we performed a subgroup analysis to explore the source of this heterogeneity.

---

210 The results showed that sample size and median age could be potential sources of heterogeneity. In conclusion, an elevated Gleason grade on  
211 PSM was associated with an increased risk of BCR.

212 Interestingly, the effect of Gleason grade on PSM was independent of the predominant Gleason pattern in the tumor, suggesting a  
213 differential biological effect. The underlying mechanism could be that the wound environment after prostatectomy leads to the production of  
214 many cytokines and angiogenic factors that respond differently to residual cancers of different Gleason grades <sup>[13]</sup>.

215 Possible factors include vascular endothelial growth factor (VEGF) and VEGF receptor fetal liver kinase (Flk)-1, which are expressed at  
216 high levels in wounds. Both can not only induce the proliferation of vascular endothelial cells but also directly induce the proliferation of PCa  
217 cells, which increase in PCa in a grade-dependent manner. Similar findings have been reported for basic fibroblast growth factor (bFGF), fms-  
218 like tyrosine kinase 1 (Flt-1), TGF- $\beta$  receptors, fibroblast growth factor, and platelet-derived growth factor <sup>[13,46,47]</sup>.

219 Contrary to the results of other studies, Huang et al. <sup>[13]</sup> found that the presence of PGG4 / 5 at the pathological margin had no significant  
220 association with the risk of BCR. However, when the PSADT was  $\leq 9$  months and  $\leq 6$  months, the presence of Gleason pattern 4 / 5 at the  
221 pathological margin was an independent predictor of BCR. Meanwhile, the follow-up time in this study was relatively short. Notably, in a large  
222 study with a median follow-up time of 13 years, Viers et al. <sup>[19]</sup> reported that although PGG4 was not significantly associated with the risk of

---

223 BCR-FS in a multivariable analysis, it was associated with a significantly increased risk of PCa-specific mortality and systemic progression.

224 Since PSM after RP has been shown to be associated with an increased incidence of BCR and mF-PSM should have more residual tumor  
225 tissues in the surgical bed, it is speculated that having more than one PSM should reflect a more aggressive disease, leading to increased BCR.  
226 Fourteen studies involving 34,194 patients were evaluated, and the pooled results based on a FE model showed that mF-PSM was associated  
227 with a significantly increased risk of BCR compared with single-focal PSM, which is consistent with the majority of studies included.

228 In contrast, Song <sup>[31]</sup> and Wu <sup>[33]</sup> retrospectively analyzed 821 and 476 patients with PCa with PSM after RP and found that patients with  
229 mF-PSM showed significantly worse BCR prognosis on univariate analysis. This finding lost significance in the multivariate analysis, in  
230 agreement with the findings of several other studies <sup>[23-25,27,29,30,36]</sup>. There are several possible reasons for this finding. Firstly, mF-PSM is more  
231 likely to occur in patients with higher pathological stages and to be associated with higher PSA levels, pT stage, and GS. This suggests that the  
232 prognostic impact of mF-PSM is influenced by other high-risk factors. At the same time, the number of patients with mF-PSM was relatively  
233 small, and they were more likely to receive adjuvant therapy after surgery, leading to their exclusion from the final study. Furthermore, the  
234 association of mF-PSMs with BCR may be influenced by other risk factors. Lastly, in non-organ-confined disease, PSM may occur at a location  
235 far from the extraprostatic extension site.

---

236 The impact of margin extent is similar to the impact of multifocality on BCR. Concerning the impact of PSM size on BCR, the  
237 comparability of various reports is limited by the different thresholds used to differentiate small and large PSM sizes. For reasons of statistical  
238 efficiency, studies generally reduce the margin extent into a categorical variable, often separated into  $<1/\geq 1$  mm or  $<3/\geq 3$  mm. The results of our  
239 meta-analysis of four studies [17,20-22] showed that  $PSM \geq 3$  mm was associated with a significantly increased risk of BCR compared with  $PSM <$   
240  $3$  mm. The sensitivity analysis showed a significant reduction in heterogeneity after the exclusion of the study by Kozal et al. [21]. This may be  
241 due to the fact that Kozal's study selected subjects for prostate resection using a single robot-assisted radical prostatectomy (RARP) method with  
242 a short follow-up period. Two studies with 2,195 patients with PCa were classified according to  $PSM \leq 3$  mm and  $PSM > 3$  mm. The pooled  
243 results indicated that compared to  $PSM < 3$  mm,  $PSM \geq 3$  mm was associated with a significantly increased risk of BCR. This finding indicates  
244 that patients with broad-spread PSM will develop a more aggressive disease, leading to decreased BCR-free survival. The primary findings  
245 suggest that patients with a PSM length of  $> 3$  mm may be eligible for more aggressive adjuvant therapy. In addition, other classified methods  
246 exist, such as  $PSM > 1$  mm vs.  $PSM \leq 1$  mm,  $PSM < 2$  mm vs.  $PSM \leq 2$  mm,  $PSM > 2.8$  mm vs  $PSM \leq 2.8$  mm, and others. Owing to the  
247 limited number of studies, no relevant meta-analysis was conducted.

248 Dev (2015) et al. [20] reported that both multifocality and  $PSM \geq 3$  mm increased the risk of BCR compared with NSM, while in the analysis

---

249 of the PSM group, only PSM  $\geq 3$  mm remained a significant predictor of BCR. Multifocality appears to confer less additional harm in terms of  
250 BCR risk, whereas margin length  $\geq 3$  mm remains highly predictive of BCR compared to margins  $< 3$  mm. One possible explanation for this  
251 phenomenon is that the presence of multiple smaller PSMs ( $< 3$  mm) during RP may reflect iatrogenic lesions, especially if the error has not  
252 been detected, rather than a single invasive lesion that breaches the surgical margin.

253 In contrast to these studies, May et al. [24] found that although PSM was an independent predictor of BCR, in a further subgroup analysis,  
254 the BCR of patients with PSM  $> 3$  mm vs  $\leq 3.0$  mm did not differ. KARL et al. [15] conducted a study that included 608 patients with  
255 pT3aN0/Nx PCa with PSM. The results showed that, although PSM  $> 3$  mm was an independent predictor of BCR in the univariate analysis, it  
256 was not an independent predictor of BCR in the multivariate analysis. Residual tumors are highly suggestive of cancer treatment failure;  
257 however, residual tumors of small size may fail to continue to grow due to damage through debris formation and reparative processes, as well as  
258 changes in the microenvironment of the tumor body and damage of tumor cells around the cutting edge. In addition, smaller-sized PSMs are  
259 more likely to be in the last layer of the tumor, after which the tumor ceases to continue spreading into the adjacent tissue. A higher pathological  
260 stage of PCa predicts increased tumor aggressiveness, which has been widely reported to be associated with an increased BCR. However, its  
261 effect on the BCR in the PSM cohort remains controversial.

---

262 In contrast to previous reports, Somford et al. [30] reported no significant difference in the BCR of pathological staging in a multivariate  
263 analysis. Moreover, Sooriakumaran [38] and Servoll et al. [48] reported that, compared to the pT3 cohort, PSM had a greater impact on the pT2  
264 cohort in predicting BCR. A possible explanation is that the patients with a higher pathological stage were more likely to receive adjuvant  
265 therapy after surgery and were therefore excluded from the final study cohort. In addition, patients with pT3 status are more likely to be  
266 complicated with PSM [23,38,48]. However, in the multivariate analysis, PSM may have a more significant effect on BCR, which would diminish  
267 the effect of pathological staging on BCR.

268 In summary, this meta-analysis revealed that  $PGG \geq 3$ ,  $PSM \geq 3$  mm, multiple PSM focality, and a higher pathologic stage of the tumor were  
269 associated with an increased risk of BCR in patients with PCa with PSM, which may also be associated with higher biological aggressiveness  
270 and should be treated differently in terms of adjunct treatment and monitoring frequency. In view of this, we recommend that the Gleason score  
271 at the PSM, its length, and PSM focality be routinely reported as part of the standard pathology document. Large-scale and well-designed  
272 prospective studies with longer follow-up periods are needed to validate the efficacy of these risk factors and their effect on the response to  
273 adjuvant and salvage therapies in this population, as well as on other oncological outcomes.

274 Nevertheless, the present study had some limitations that should be acknowledged. First, all the included studies were retrospective, which

---

275 may have led to a selection bias. Second, in this study, there was no subgroup analysis on the impact of the Gleason score at the PSM, its length,  
276 and the PSM focality on BCR. This is because there were few relevant studies and inconsistent relevant classification standards. Third, the  
277 literature involved in this study was limited to papers published in English, which may have led to selection bias. Finally, heterogeneity was  
278 detected among the enrolled studies in some data analyses, which could have influenced the final results.

279

## 280 **Supporting information**

281 **S1 Table. NOS Scores of included study.(PDF)**

282 **S1 Fig.(A) Forest plots of studies excluded Iremashvili's study evaluating the association between PGG and BCR, (B) Forest plots of**  
283 **studies excluded Vier's study evaluating the association between PGG and BCR.**

284 **S2 Fig.Forest plots of studies excluded Kozal's study evaluating the association between length of PSM and BCR.**

285 **Additional file 1.Forest plots of studies evaluate the association between PGG and BCR.(PDF)**

286 **Additional file 2.Forest plots of studies evaluate the association between length of PSM and BCR (<3 mm VS≥3 mm).(PDF)**

287 **Additional file 3.Forest plots of studies evaluate the association between focality of PSM and BCR.(PDF)**



---

288 **Additional file 4.Forest plots of studies evaluate the association between pT3a/pT2 and BCR.(PDF)**

289 **Additional file 5.Forest plots of studies evaluate the association between pT3-4/pT2 and BCR.(PDF)**

290 **S1 Text. PRISMA Abstract Checklist.(DOCX)**

291 **S2 Text. PRISMA 2020 Checklist.(DOCX)**

292 **S3 Text. Search strategy.(DOCX)**

293

## 294 **Acknowledgments**

295 We would like to thank all the participants for their support during the follow-up study, as well as the researchers who had published high-  
296 quality articles for our meta-analysis.

297

## 298 **Author Contributions**

299 Conceptualization: Hong Guo,Lei Zhang,Yuan Shao.

300 Data curation: Hong Guo,Lei Zhang,Kunyang An.

- 
- 301 Formal analysis:Hong Guo,Yuan Shao,Kunyang An.
- 302 Investigation:Hong Guo,Yuan Shao,Kunyang An.
- 303 Methodology:Hong Guo,Lei Zhang,Kunyang An,Caoyang Hu,Dongwen Wang.
- 304 Project administration:Caoyang Hu,Xuezhi Liang,Dongwen Wang.
- 305 Resources:Hong Guo,Dongwen Wang.
- 306 Software:Hong Guo,Lei Zhang,Yuan Shao,Kunyang An.
- 307 Supervision:Caoyang Hu,Xuezhi Liang,Dongwen Wang.
- 308 Validation:Hong Guo,Yuan Shao,Xuezhi Liang.
- 309 Visualization:Lei Zhang.
- 310 Writing – original draft:Hong Guo,Lei Zhang,Caoyang Hu.
- 311 Writing – review & editing:Dongwen Wang.

312

313 **References**

- 
- 314 1. Siegel RL, Miller KD, Jemal A. Cancer statistics, 2020. *CA Cancer J Clin.* 2020;70(1):7-30.
- 315 2. Wilkins LJ, Tosoian JJ, Sundi D, Ross AE, Grimberg D, Klein EA, et al. Surgical management of high-risk, localized prostate cancer. *Nat*  
316 *Rev Urol.* 2020;17(12):679-90.
- 317 3. Tourinho-Barbosa R, Srougi V, Nunes-Silva I, Baghdadi M, Rembeyo G, Eiffel SS, et al. Biochemical recurrence after radical  
318 prostatectomy: what does it mean? *Int Braz J Urol.* 2018;44(1):14-21.
- 319 4. Zhang L, Zhao H, Wu B, Zha Z, Yuan J, Feng Y. Predictive Factors for Positive Surgical Margins in Patients With Prostate Cancer After  
320 Radical Prostatectomy: A Systematic Review and Meta-Analysis. *Front Oncol.* 2020;10:539592.
- 321 5. Tewari A, Sooriakumaran P, Bloch DA, Seshadri-Kreaden U, Hebert AE, Wiklund P. Positive surgical margin and perioperative  
322 complication rates of primary surgical treatments for prostate cancer: a systematic review and meta-analysis comparing retropubic,  
323 laparoscopic, and robotic prostatectomy. *Eur Urol.* 2012;62(1):1-15.
- 324 6. Zhang L, Wu B, Zha Z, Zhao H, Jiang Y, Yuan J. Positive surgical margin is associated with biochemical recurrence risk following radical  
325 prostatectomy: a meta-analysis from high-quality retrospective cohort studies. *World J Surg Oncol.* 2018;16(1):124.
- 326 7. Yossepowitch O, Briganti A, Eastham JA, Epstein J, Graefen M, Montironi R, et al. Positive surgical margins after radical prostatectomy: a

- 
- 327 systematic review and contemporary update. *Eur Urol.* 2014;65(2):303-13.
- 328 8. Spahn M, Joniau S. Positive surgical margin at radical prostatectomy: futile or surgeon-dependent predictor of prostate cancer death? *Eur*  
329 *Urol.* 2013;64(1):26-8.
- 330 9. Chapin BF, Nguyen JN, Achim MF, Navai N, Williams SB, Prokhorova IN, et al. Positive margin length and highest Gleason grade of  
331 tumor at the margin predict for biochemical recurrence after radical prostatectomy in patients with organ-confined prostate cancer. *Prostate*  
332 *Cancer Prostatic Dis.* 2018;21(2):221-7.
- 333 10. Mottet N, Bellmunt J, Bolla M, Briers E, Cumberbatch MG, De Santis M, et al. EAU-ESTRO-SIOG Guidelines on Prostate Cancer. Part 1:  
334 Screening, Diagnosis, and Local Treatment with Curative Intent. *Eur Urol.* 2017;71(4):618-29.
- 335 11. Mohler JL, Armstrong AJ, Bahnson RR, D'Amico AV, Davis BJ, Eastham JA, et al. Prostate Cancer, Version 1.2016. *J Natl Compr Canc*  
336 *Netw.* 2016;14(1):19-30.
- 337 12. Dason S, Vertosick EA, Udo K, Sjoberg DD, Vickers AJ, Al-Ahmadie H, et al. Clinical utility of subclassifying positive surgical margins at  
338 radical prostatectomy. *BJU Int.* 2022;129(2):194-200.
- 339 13. Huang JG, Pedersen J, Hong MK, Harewood LM, Peters J, Costello AJ, et al. Presence or absence of a positive pathological margin

- 
- 340 outperforms any other margin-associated variable in predicting clinically relevant biochemical recurrence in Gleason 7 prostate cancer. *BJU*  
341 *Int.* 2013;111(6):921-7.
- 342 14. Iremashvili V, Pelaez L, Jorda M, Parekh DJ, Punnen S. A Comprehensive Analysis of the Association Between Gleason Score at a Positive  
343 Surgical Margin and the Risk of Biochemical Recurrence After Radical Prostatectomy. *Am J Surg Pathol.* 2019;43(3):369-73.
- 344 15. Karl A, Buchner A, Tympner C, Kirchner T, Ganswindt U, Belka C, et al. Risk and timing of biochemical recurrence in pT3aN0/Nx prostate  
345 cancer with positive surgical margin - A multicenter study. *Radiother Oncol.* 2015;116(1):119-24.
- 346 16. Lee W, Lim B, Kyung YS, Kim CS. Impact of positive surgical margin on biochemical recurrence in localized prostate cancer. *Prostate Int.*  
347 2021;9(3):151-6.
- 348 17. Preisser F, Coxilha G, Heinze A, Oh S, Chun FK, Sauter G, et al. Impact of positive surgical margin length and Gleason grade at the margin  
349 on biochemical recurrence in patients with organ-confined prostate cancer. *Prostate.* 2019;79(16):1832-6.
- 350 18. Savdie R, Horvath LG, Benito RP, Rasiah KK, Haynes AM, Chatfield M, et al. High Gleason grade carcinoma at a positive surgical margin  
351 predicts biochemical failure after radical prostatectomy and may guide adjuvant radiotherapy. *BJU Int.* 2012;109(12):1794-800.
- 352 19. Viers BR, Sukov WR, Gettman MT, Rangel LJ, Bergstralh EJ, Frank I, et al. Primary Gleason grade 4 at the positive margin is associated

- 
- 353 with metastasis and death among patients with Gleason 7 prostate cancer undergoing radical prostatectomy. *Eur Urol.* 2014;66(6):1116-24.
- 354 20. Dev HS, Wiklund P, Patel V, Parashar D, Palmer K, Nyberg T, et al. Surgical margin length and location affect recurrence rates after robotic  
355 prostatectomy. *Urol Oncol.* 2015;33(3):109 e7-13.
- 356 21. Kozal S, Peyronnet B, Cattarino S, Seisen T, Comperat E, Vaessen C, et al. Influence of pathological factors on oncological outcomes after  
357 robot-assisted radical prostatectomy for localized prostate cancer: Results of a prospective study. *Urol Oncol.* 2015;33(7):330 e1-7.
- 358 22. Ploussard G, Drouin SJ, Rode J, Allory Y, Vordos D, Hoznek A, et al. Location, extent, and multifocality of positive surgical margins for  
359 biochemical recurrence prediction after radical prostatectomy. *World J Urol.* 2014;32(6):1393-400.
- 360 23. Ginzburg S, Nevers T, Staff I, Tortora J, Champagne A, Kesler SS, et al. Prostate cancer biochemical recurrence rates after robotic-assisted  
361 laparoscopic radical prostatectomy. *JSLs.* 2012;16(3):443-50.
- 362 24. May M, Brookman-May S, Weissbach L, Herbst H, Gilfrich C, Papadopoulos T, et al. Solitary and small ( $\leq 3$  mm) apical positive surgical  
363 margins are related to biochemical recurrence after radical prostatectomy. *Int J Urol.* 2011;18(4):282-9.
- 364 25. Godoy G, Tareen BU, Lepor H. Site of positive surgical margins influences biochemical recurrence after radical prostatectomy. *BJU Int.*  
365 2009;104(11):1610-4.

- 
- 366 26. Lee JW, Ryu JH, Kim YB, Yang SO, Lee JK, Jung TY. Do positive surgical margins predict biochemical recurrence in all patients without  
367 adjuvant therapy after radical prostatectomy? *Korean J Urol.* 2013;54(8):510-5.
- 368 27. Porpiglia F, Fiori C, Manfredi M, Grande S, Poggio M, Bollito E, et al. Surgical margin status of specimen and oncological outcomes after  
369 laparoscopic radical prostatectomy: experience after 400 procedures. *World J Urol.* 2012;30(2):245-50.
- 370 28. Resnick MJ, Canter DJ, Guzzo TJ, Magerfleisch L, Tomaszewski JE, Brucker BM, et al. Defining pathological variables to predict  
371 biochemical failure in patients with positive surgical margins at radical prostatectomy: implications for adjuvant radiotherapy. *BJU Int.*  
372 2010;105(10):1377-80.
- 373 29. Simon MA, Kim S, Soloway MS. Prostate specific antigen recurrence rates are low after radical retropubic prostatectomy and positive  
374 margins. *J Urol.* 2006;175(1):140-4; discussion 4-5.
- 375 30. Somford DM, van Oort IM, Cosyns JP, Witjes JA, Kiemeny LA, Tombal B. Prognostic relevance of number and bilaterality of positive  
376 surgical margins after radical prostatectomy. *World J Urol.* 2012;30(1):105-10.
- 377 31. Song W, Lee DH, Jeon HG, Jeong BC, Seo SI, Lee HM, et al. Impact of Gleason score on biochemical recurrence in patients with  
378 pT3aN0/Nx prostate cancer with positive surgical margins: a multicenter study from the Prostate Cancer Research Committee. *J Cancer Res*

- 
- 379 Clin Oncol. 2017;143(11):2393-400.
- 380 32. Stephenson AJ, Wood DP, Kattan MW, Klein EA, Scardino PT, Eastham JA, et al. Location, extent and number of positive surgical margins  
381 do not improve accuracy of predicting prostate cancer recurrence after radical prostatectomy. J Urol. 2009;182(4):1357-63.
- 382 33. Wu S, Lin SX, Wirth GJ, Lu M, Lu J, Subtelny AO, et al. Impact of Multifocality and Multilocation of Positive Surgical Margin After  
383 Radical Prostatectomy on Predicting Oncological Outcome. Clin Genitourin Cancer. 2019;17(1):e44-e52.
- 384 34. Lian Z, Zhang H, He Z, Ma S, Wang X, Liu R. Impact of positive surgical margin location and perineural invasion on biochemical  
385 recurrence in patients undergoing radical prostatectomy. World J Surg Oncol. 2020;18(1):201.
- 386 35. Kordan Y, Salem S, Chang SS, Clark PE, Cookson MS, Davis R, et al. Impact of positive apical surgical margins on likelihood of  
387 biochemical recurrence after radical prostatectomy. J Urol. 2009;182(6):2695-701.
- 388 36. van Oort IM, Bruins HM, Kiemeny LA, Knipscheer BC, Witjes JA, Hulsbergen-van de Kaa CA. The length of positive surgical margins  
389 correlates with biochemical recurrence after radical prostatectomy. Histopathology. 2010;56(4):464-71.
- 390 37. Porcaro AB, Tafuri A, Sebben M, Amigoni N, Shakir A, Corsi P, et al. Linear extent of positive surgical margin impacts biochemical  
391 recurrence after robot-assisted radical prostatectomy in a high-volume center. J Robot Surg. 2020;14(4):663-75.



- 
- 392 38. Sooriakumaran P, Ploumidis A, Nyberg T, Olsson M, Akre O, Haendler L, et al. The impact of length and location of positive margins in  
393 predicting biochemical recurrence after robot-assisted radical prostatectomy with a minimum follow-up of 5 years. *BJU Int.*  
394 2015;115(1):106-13.
- 395 39. Keller EX, Bachofner J, Britschgi AJ, Saba K, Mortezaei A, Kaufmann B, et al. Prognostic value of unifocal and multifocal positive  
396 surgical margins in a large series of robot-assisted radical prostatectomy for prostate cancer. *World J Urol.* 2019;37(9):1837-44.
- 397 40. Richters A, Derks J, Fossion LM, Kil PJ, Verhoeven RH, Aarts MJ. Presence and Number of Positive Surgical Margins after Radical  
398 Prostatectomy for Prostate Cancer: Effect on Oncological Outcome in a Population-Based Cohort. *Urol Int.* 2015;95(4):472-7.
- 399 41. Stephenson AJ, Eggener SE, Hernandez AV, Klein EA, Kattan MW, Wood DP, Jr., et al. Do margins matter? The influence of positive  
400 surgical margins on prostate cancer-specific mortality. *Eur Urol.* 2014;65(4):675-80.
- 401 42. Zhang B, Zhou J, Wu S, Guo M, Zhang Y, Liu R. The impact of surgical margin status on prostate cancer-specific mortality after radical  
402 prostatectomy: a systematic review and meta-analysis. *Clin Transl Oncol.* 2020;22(11):2087-96.
- 403 43. Schreiber D, Rineer J, Yu JB, Olsheski M, Nwokedi E, Schwartz D, et al. Analysis of pathologic extent of disease for clinically localized  
404 prostate cancer after radical prostatectomy and subsequent use of adjuvant radiation in a national cohort. *Cancer.* 2010;116(24):5757-66.

- 
- 405 44. Zhang L, Wu B, Zha Z, Zhao H, Yuan J, Jiang Y, et al. Surgical margin status and its impact on prostate cancer prognosis after radical  
406 prostatectomy: a meta-analysis. *World J Urol.* 2018;36(11):1803-15.
- 407 45. Hollemans E, Verhoef EI, Bangma CH, Rietbergen J, Helleman J, Roobol MJ, et al. Prostate Carcinoma Grade and Length But Not  
408 Cribriform Architecture at Positive Surgical Margins Are Predictive for Biochemical Recurrence After Radical Prostatectomy. *Am J Surg*  
409 *Pathol.* 2020;44(2):191-7.
- 410 46. Wikstrom P, Lissbrant IF, Stattin P, Egevad L, Bergh A. Endoglin (CD105) is expressed on immature blood vessels and is a marker for  
411 survival in prostate cancer. *Prostate.* 2002;51(4):268-75.
- 412 47. Hagglof C, Hammarsten P, Josefsson A, Stattin P, Paulsson J, Bergh A, et al. Stromal PDGFRbeta expression in prostate tumors and non-  
413 malignant prostate tissue predicts prostate cancer survival. *PLoS One.* 2010;5(5):e10747.
- 414 48. Servoll E, Vlatkovic L, Saeter T, Nesland JM, Axcrona U, Waaler G, et al. The length of a positive surgical margin is of prognostic  
415 significance in patients with clinically localized prostate cancer treated with radical prostatectomy. *Urol Int.* 2014;93(3):289-95.

416

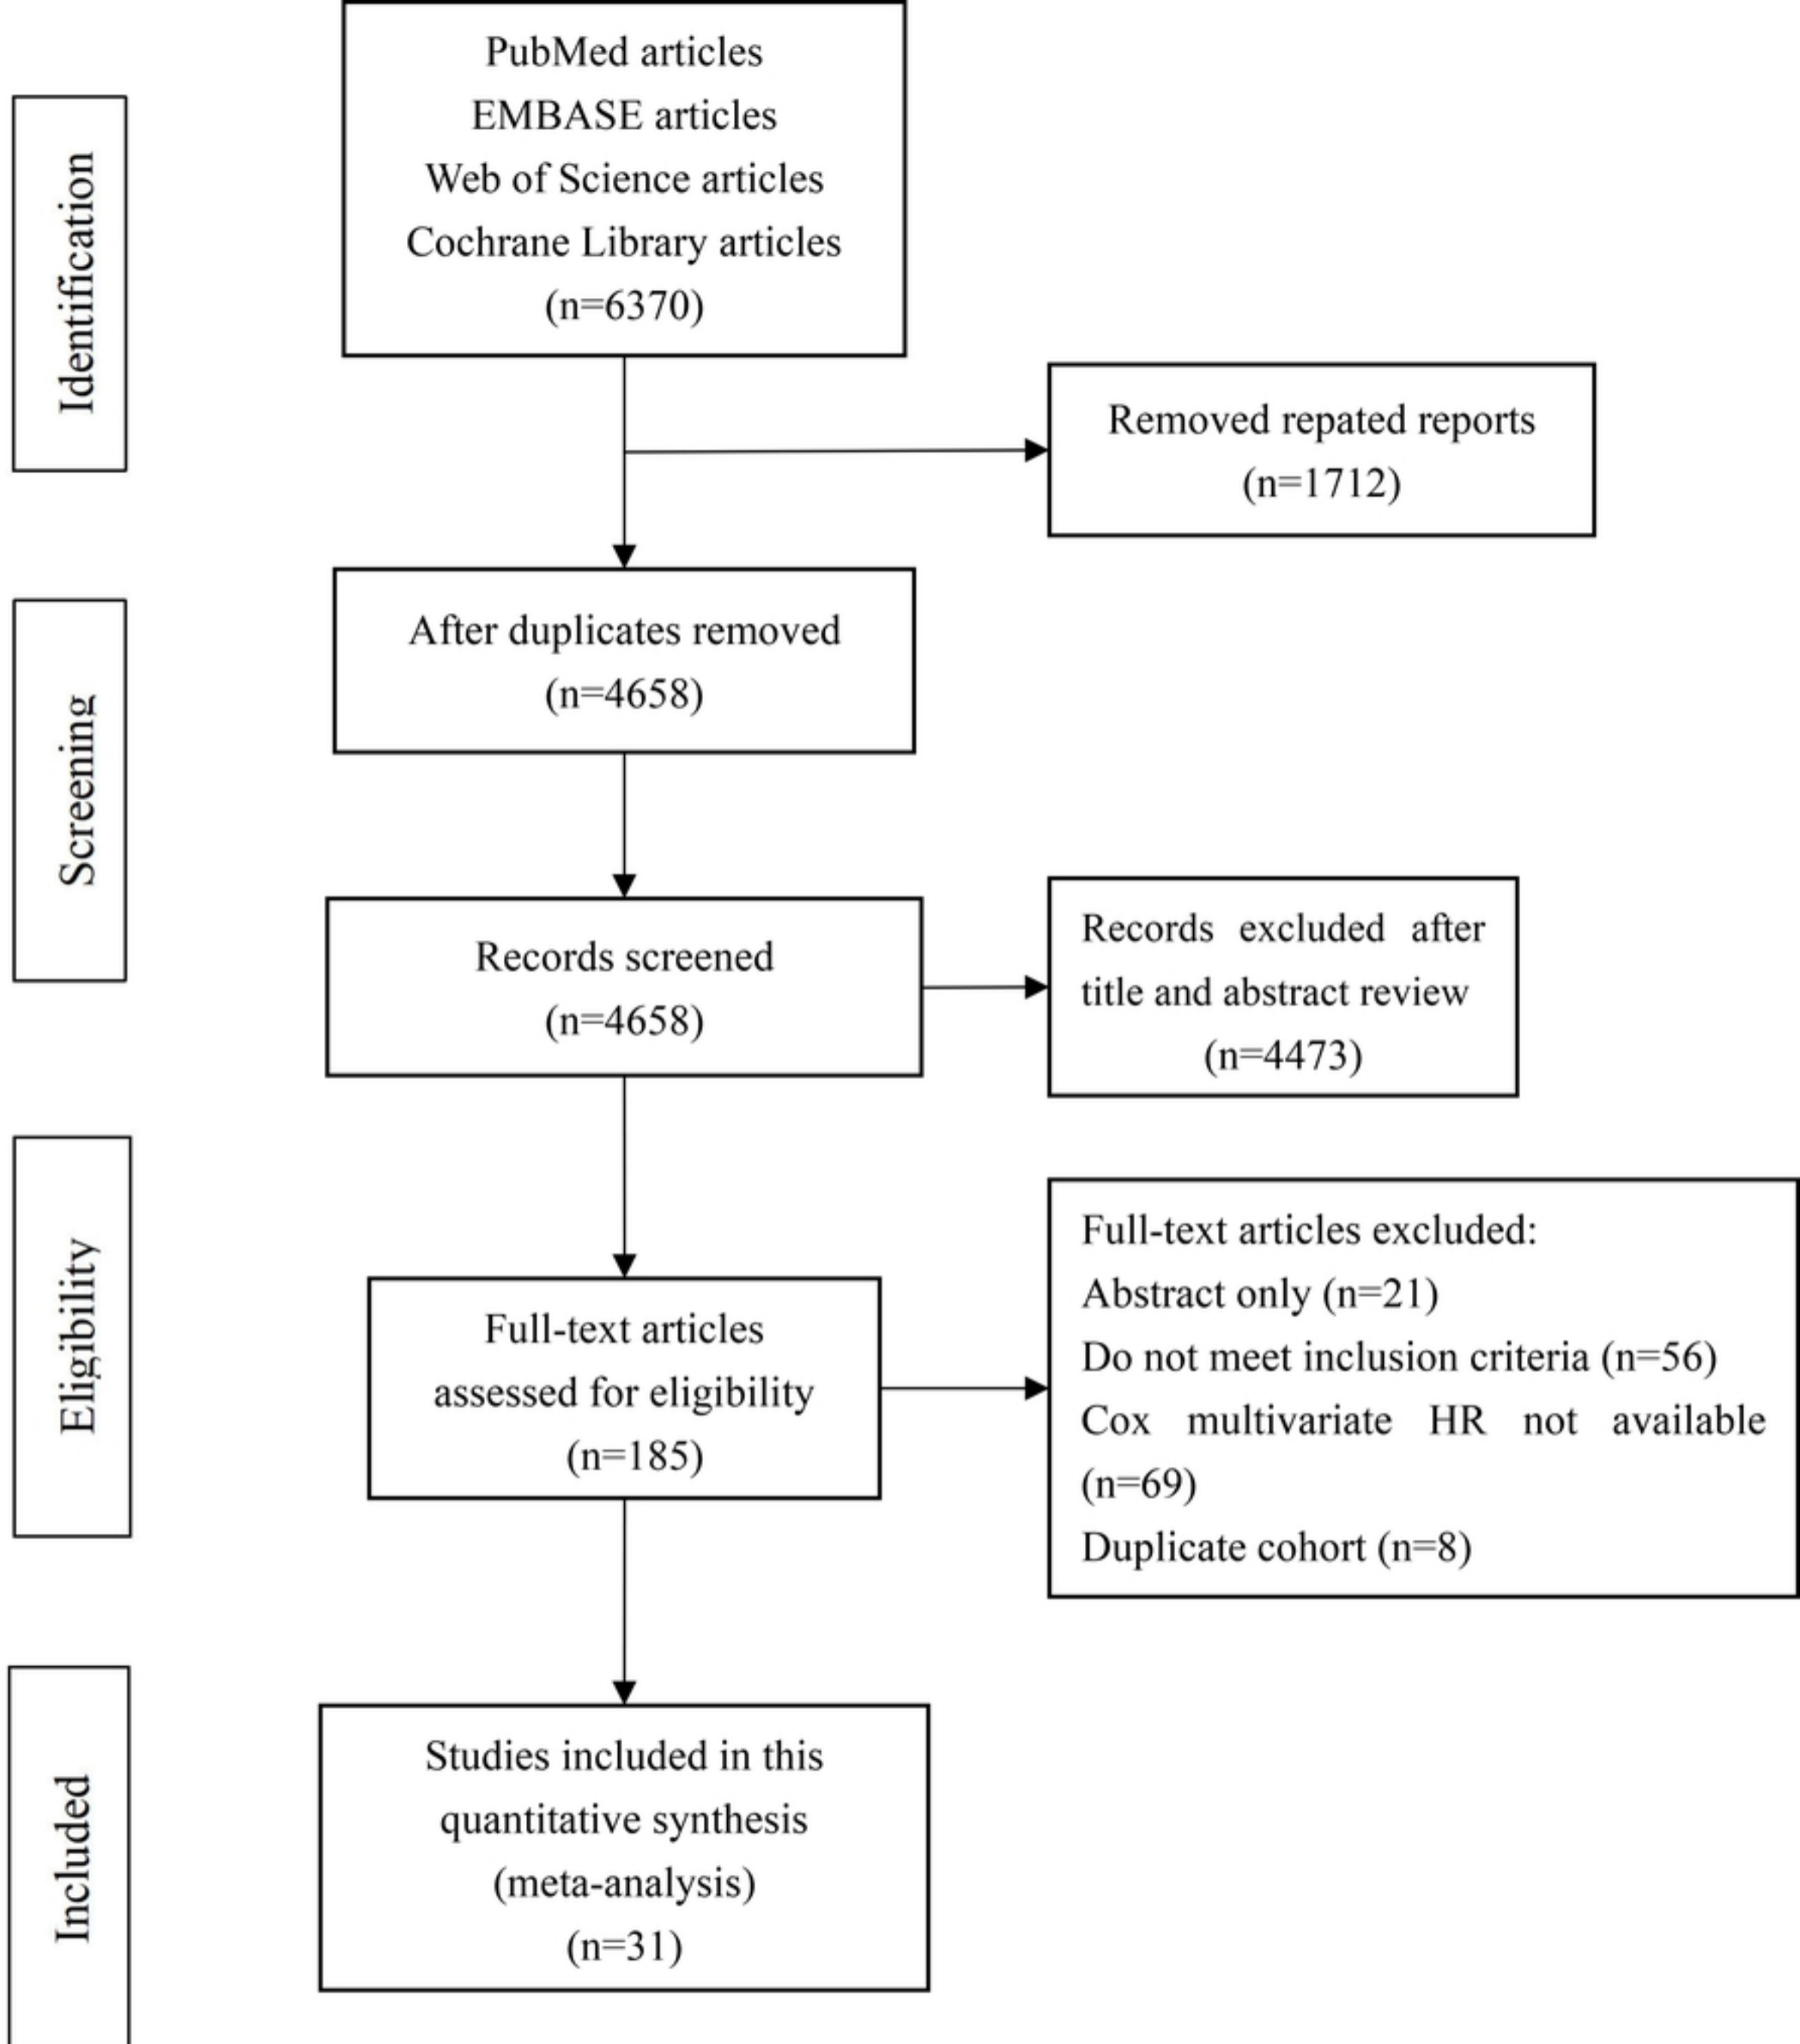

Fig1 Flowchart of the literature review process for the selection of

A

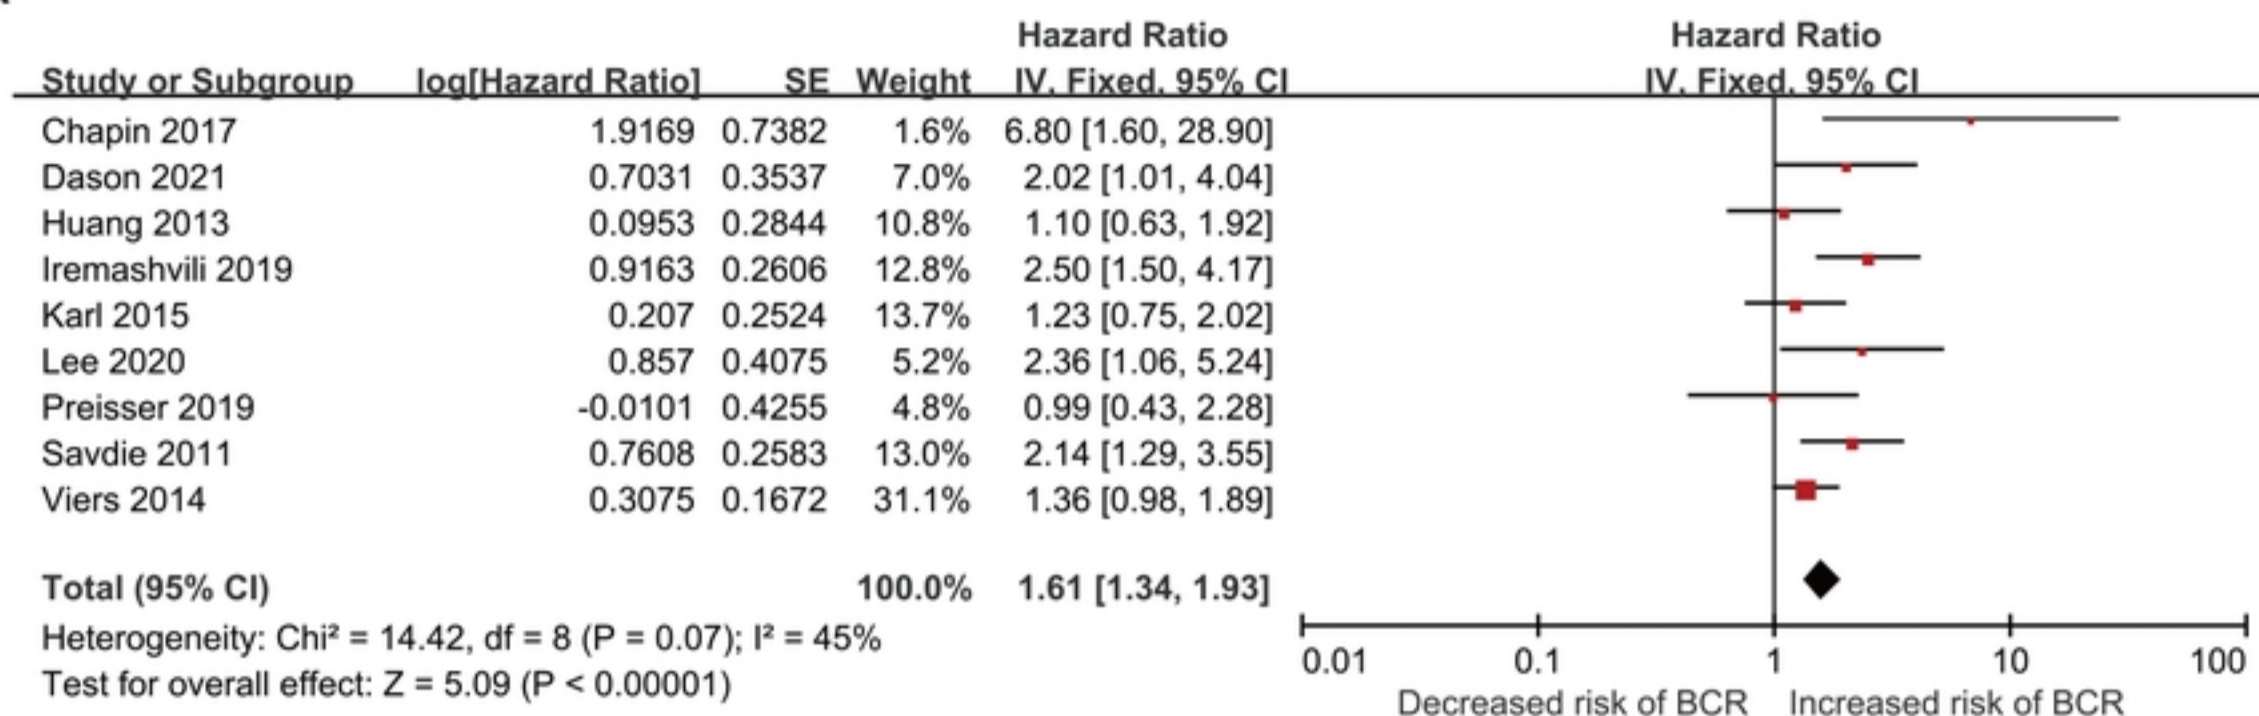

B

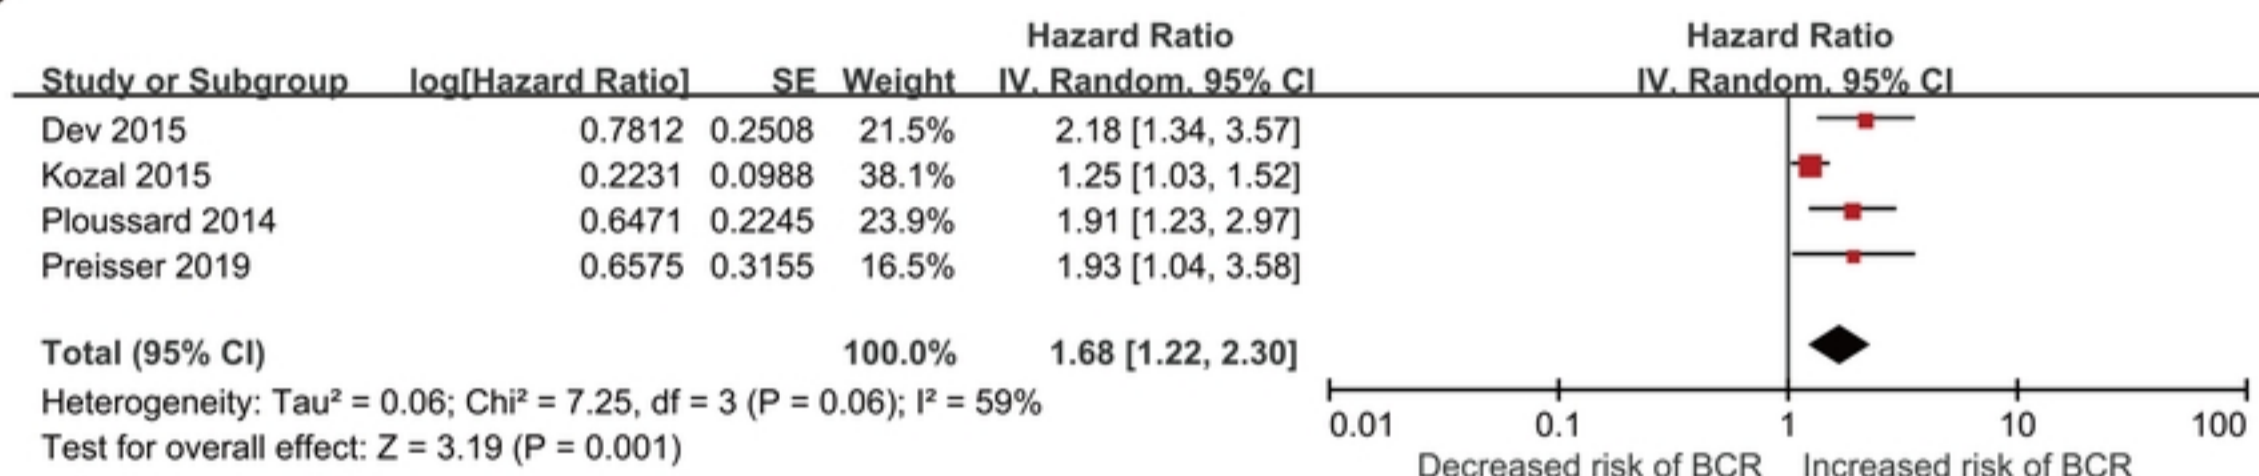

C

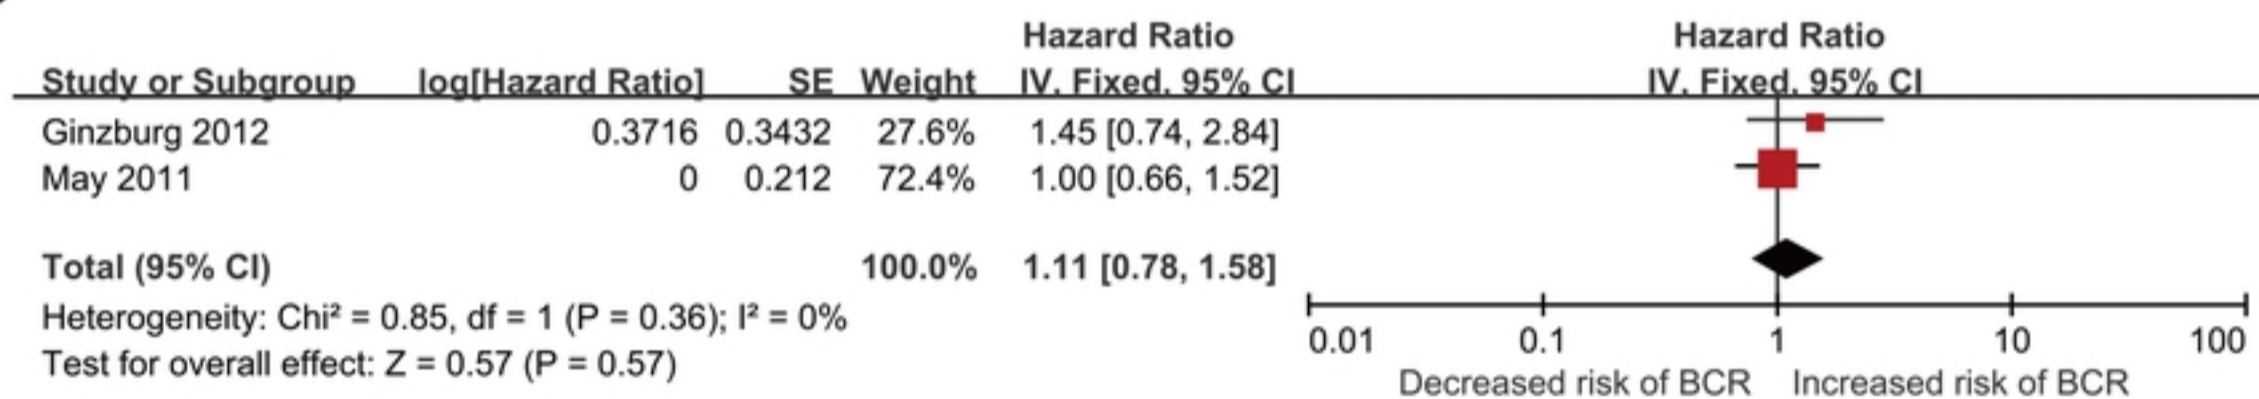

D

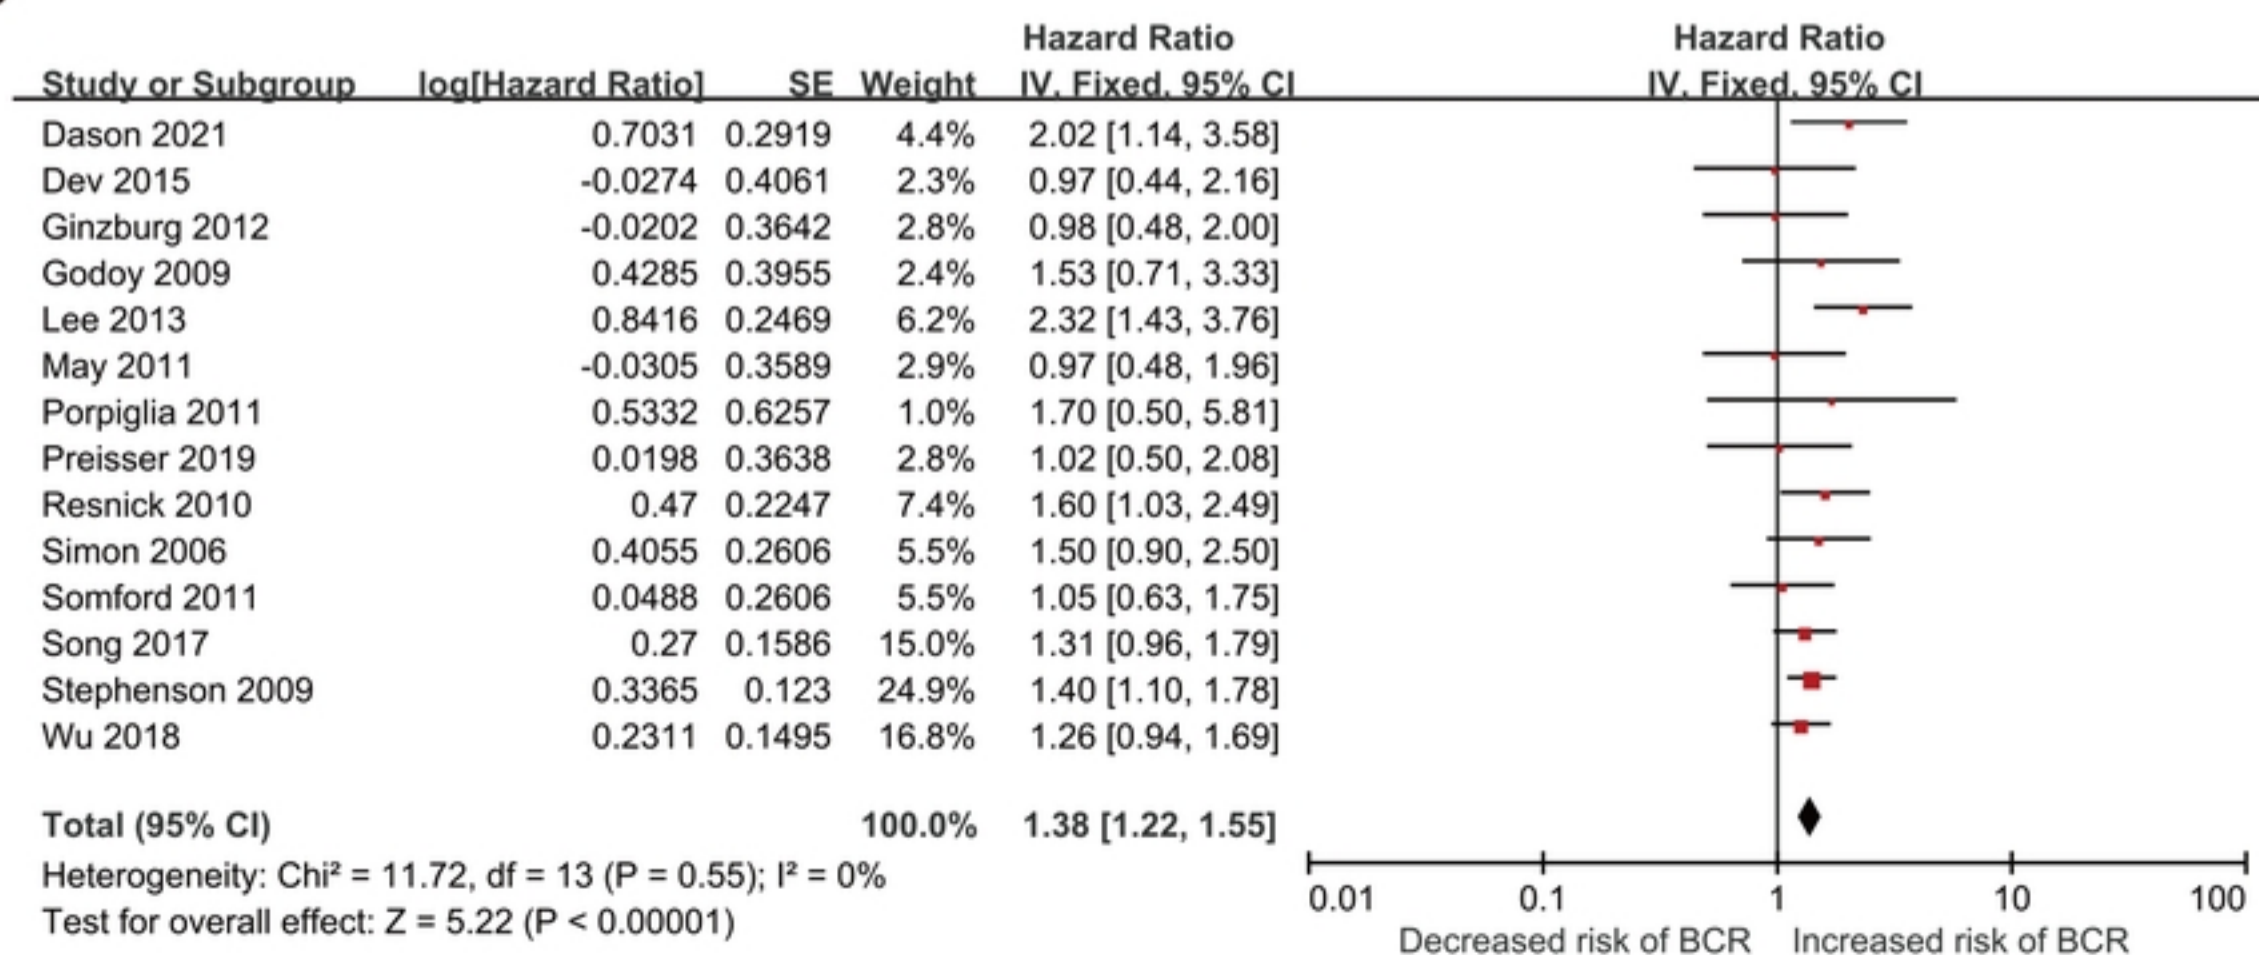

Fig2Forest plots of included studies evaluating the association between

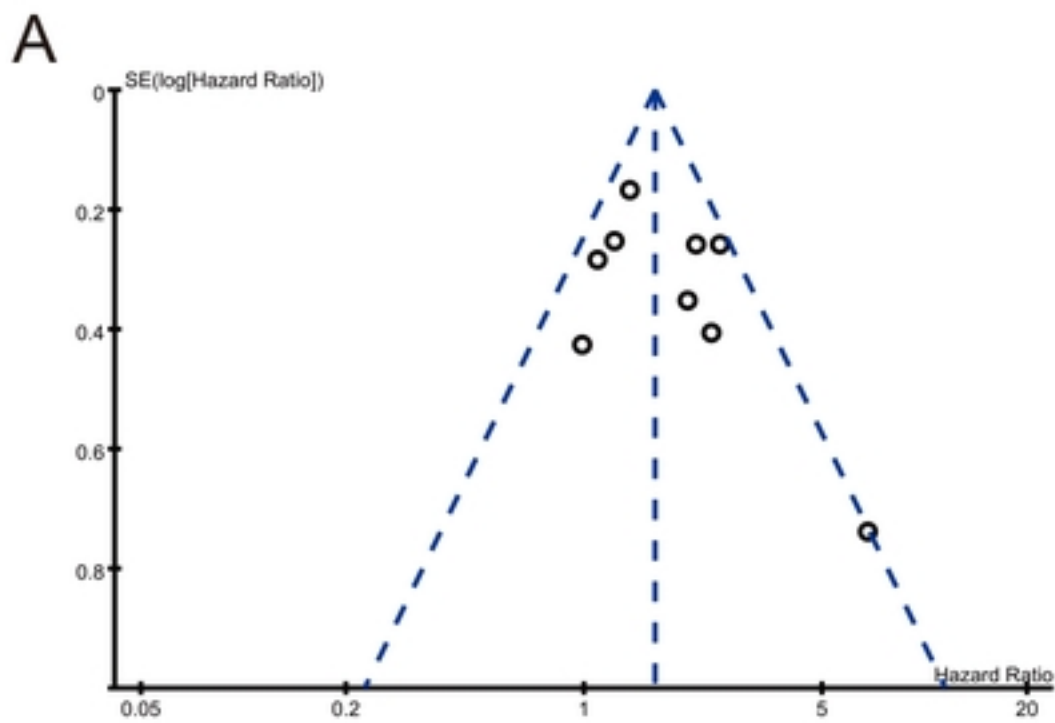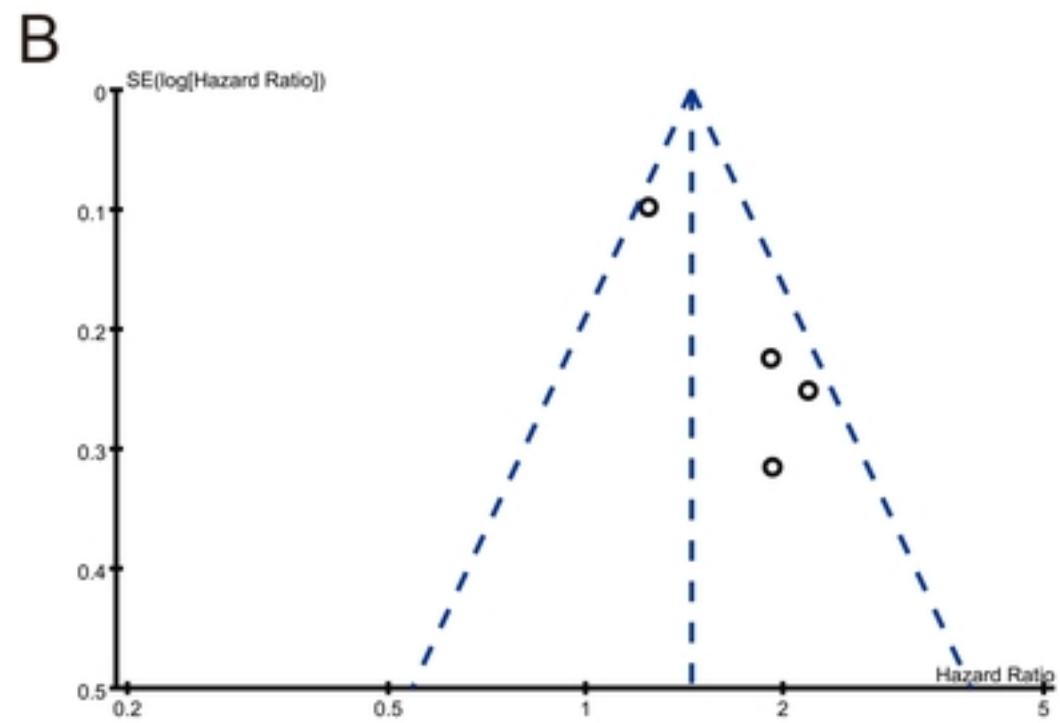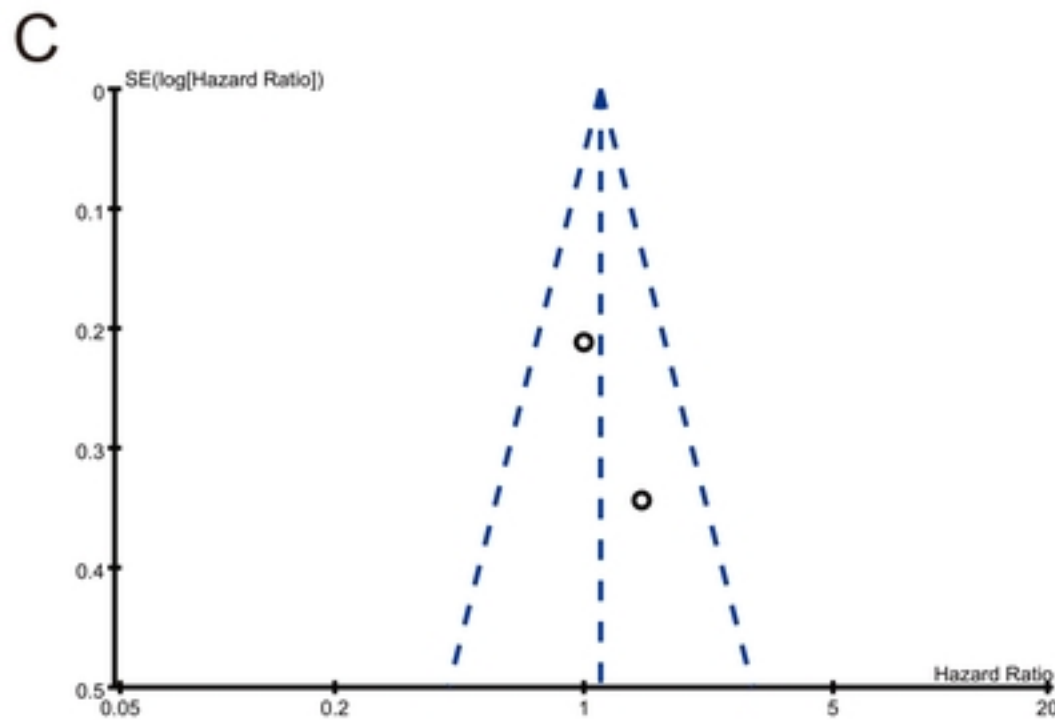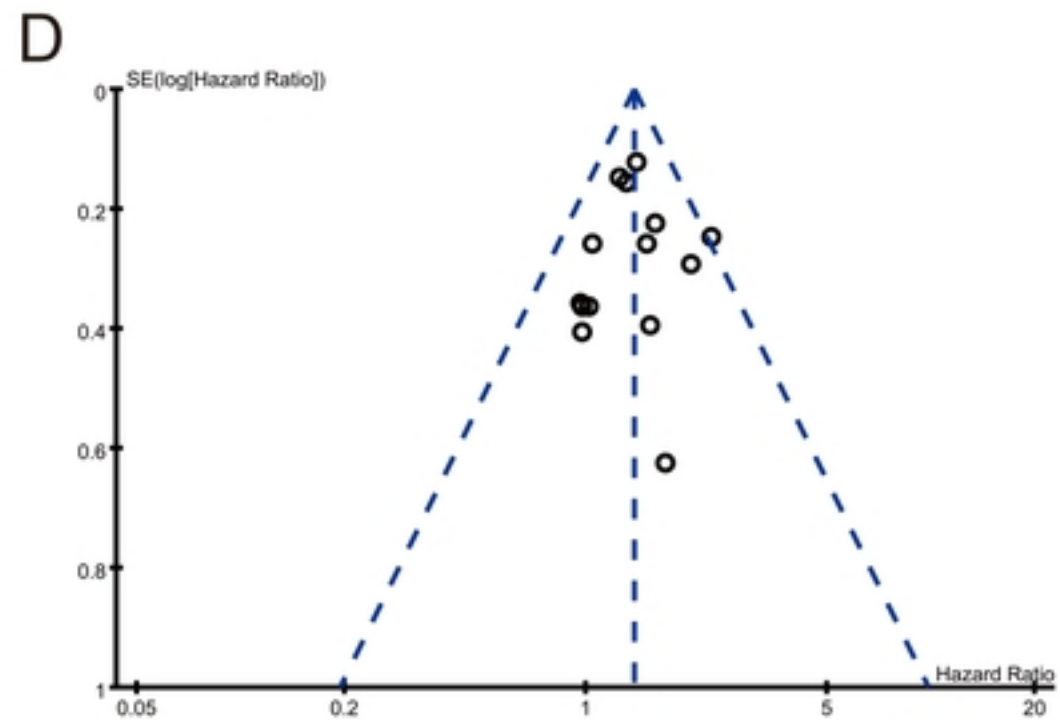

Fig3 Funnel plots of (A) PGG and BCR, (B)&(C) length of PSM (D) n

A

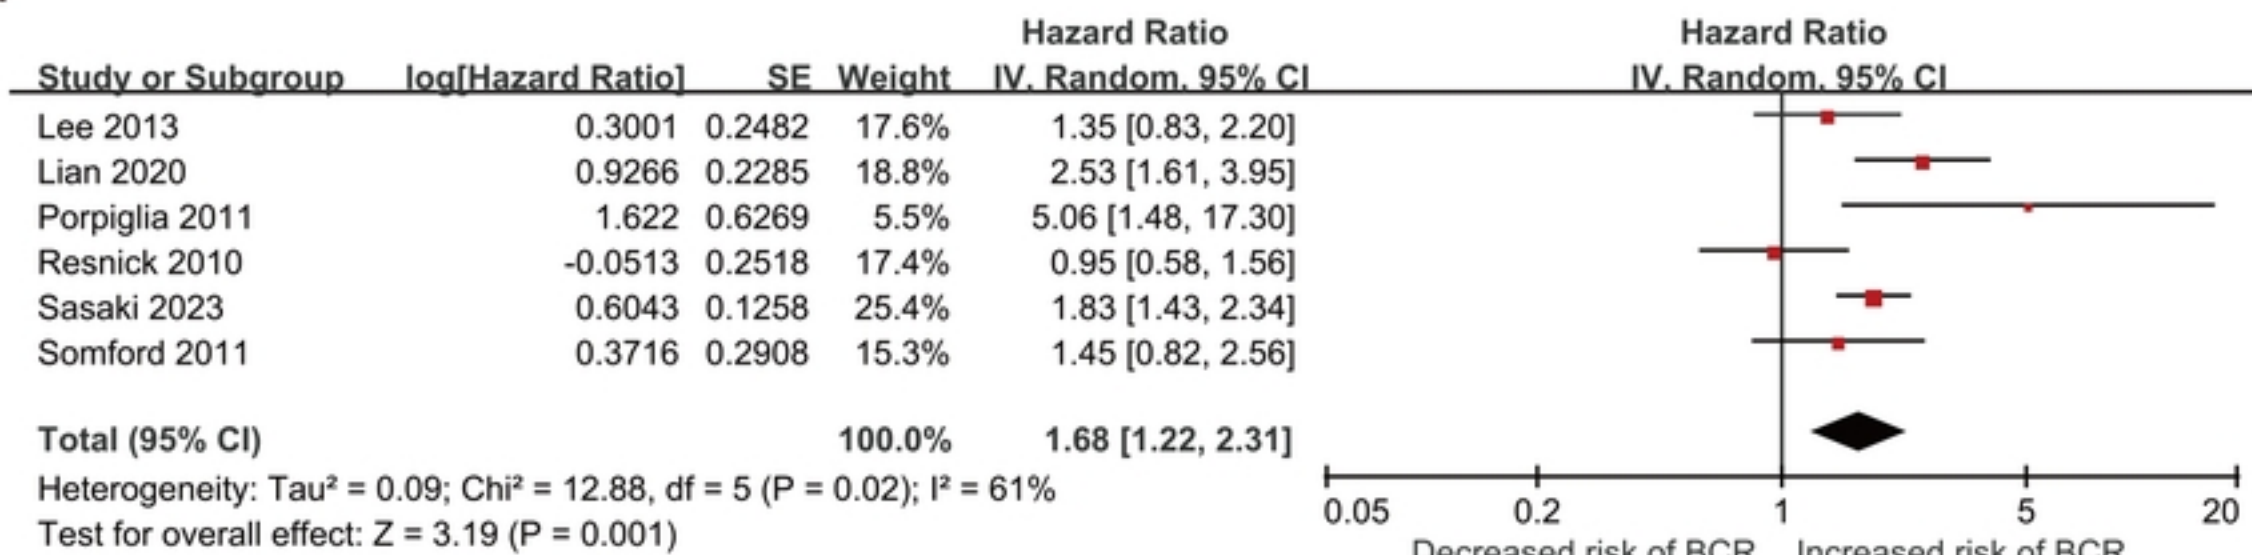

B

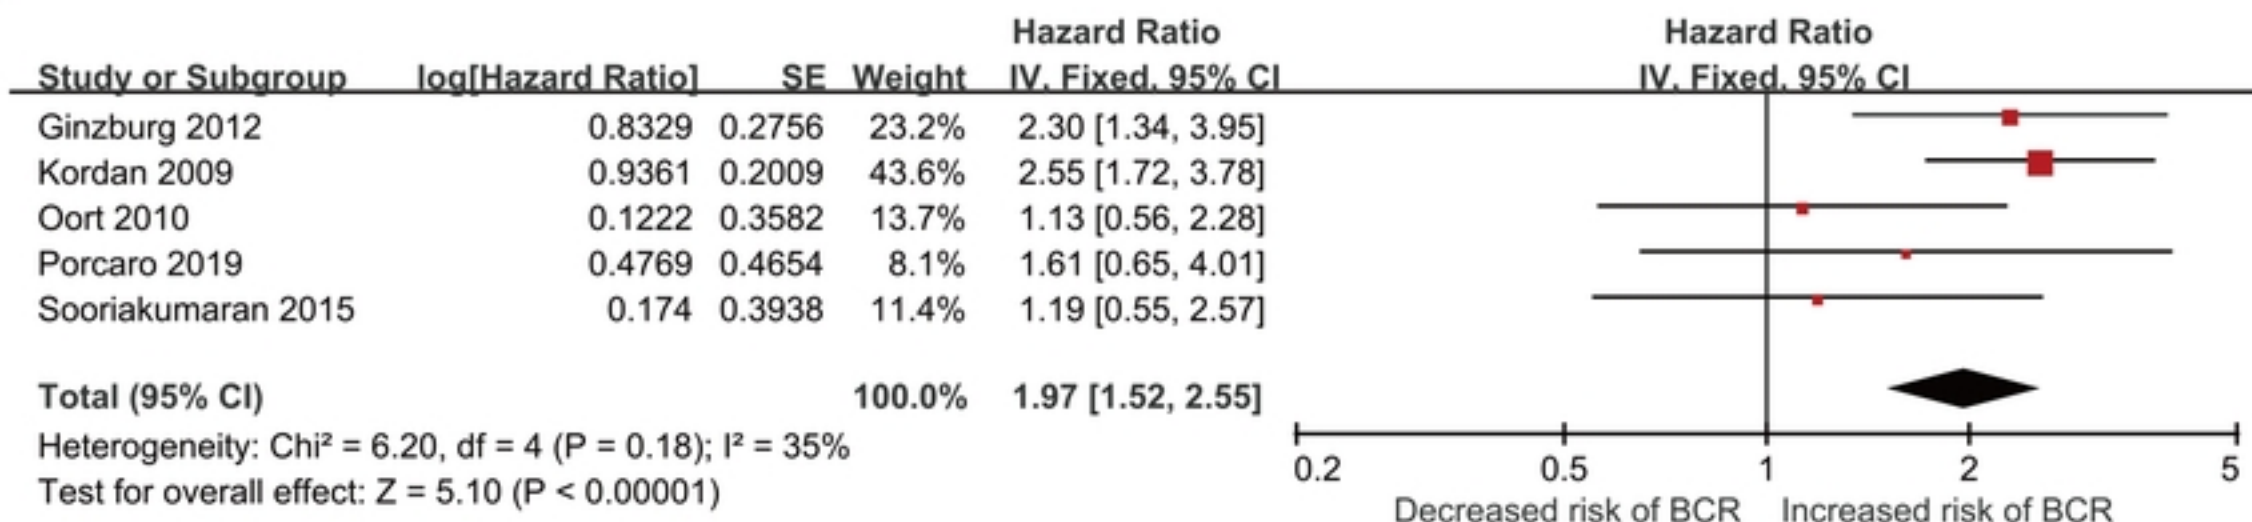

C

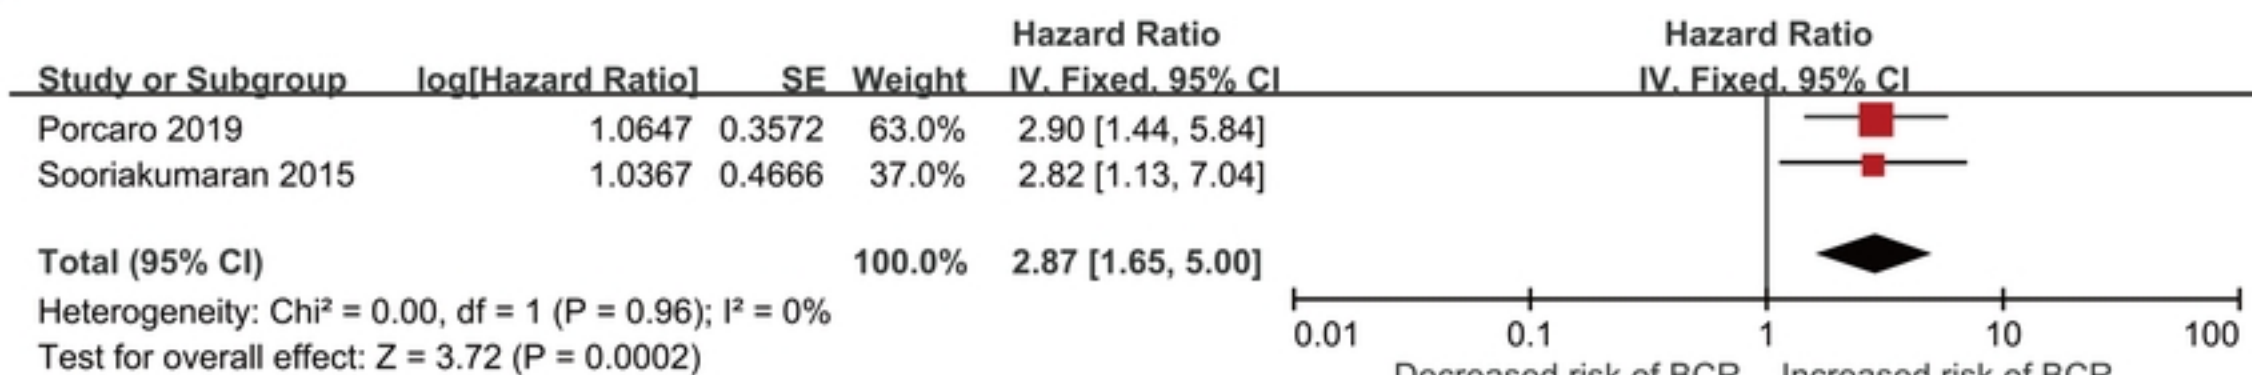

D

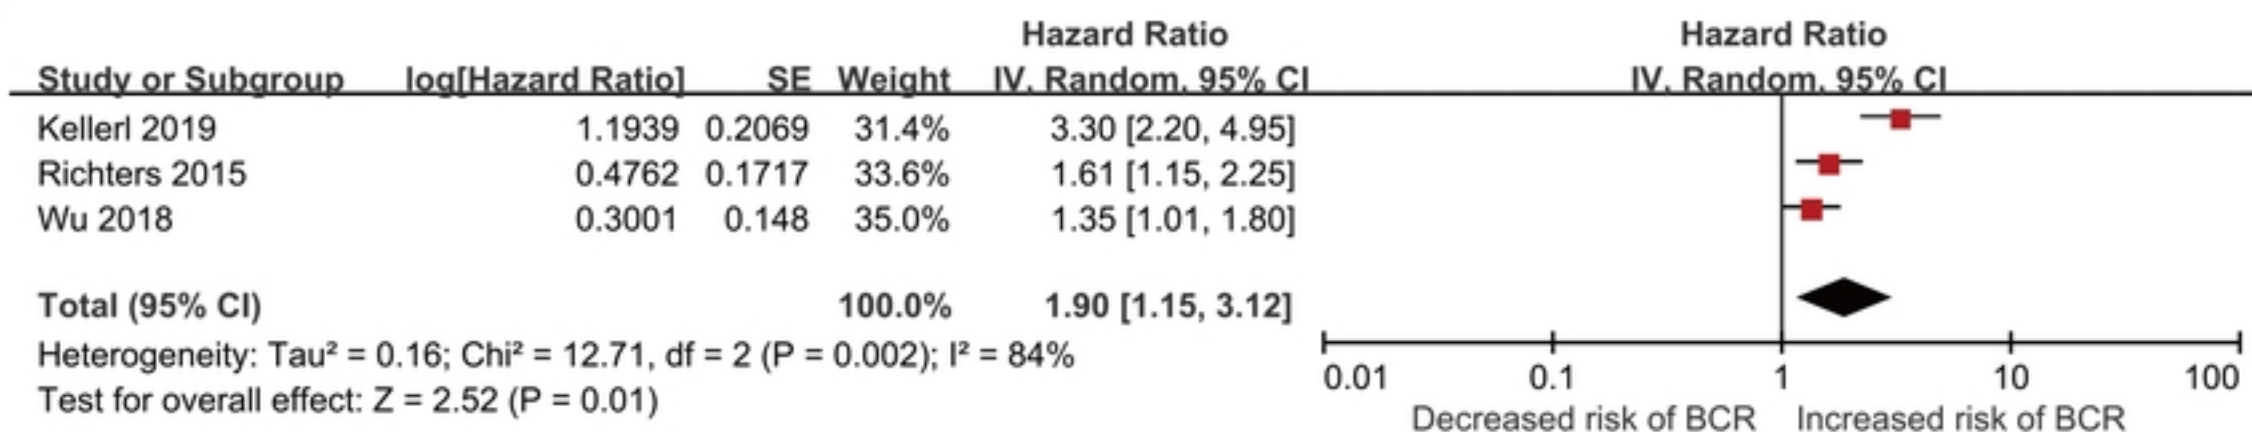

Fig4Forest plots of included studies evaluating the association between

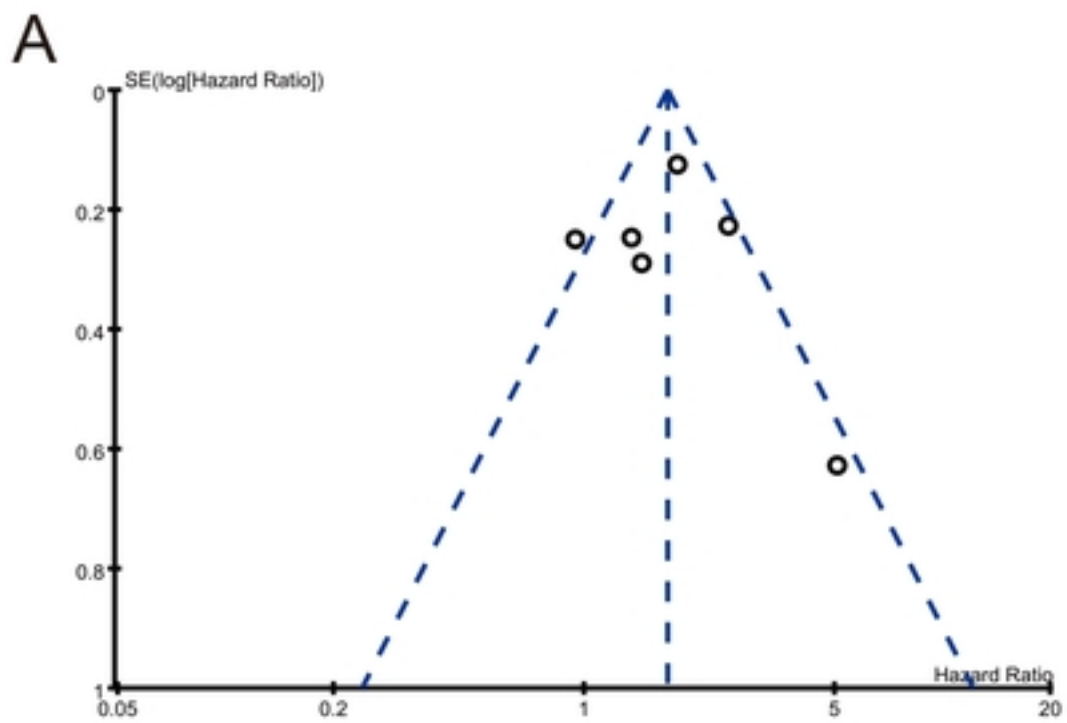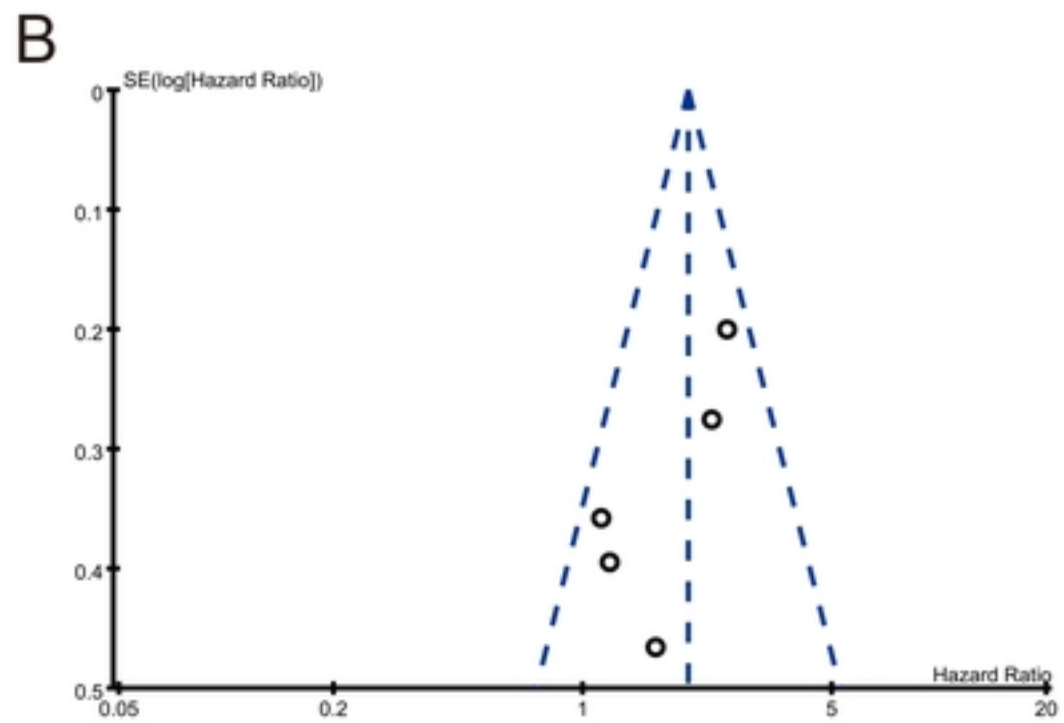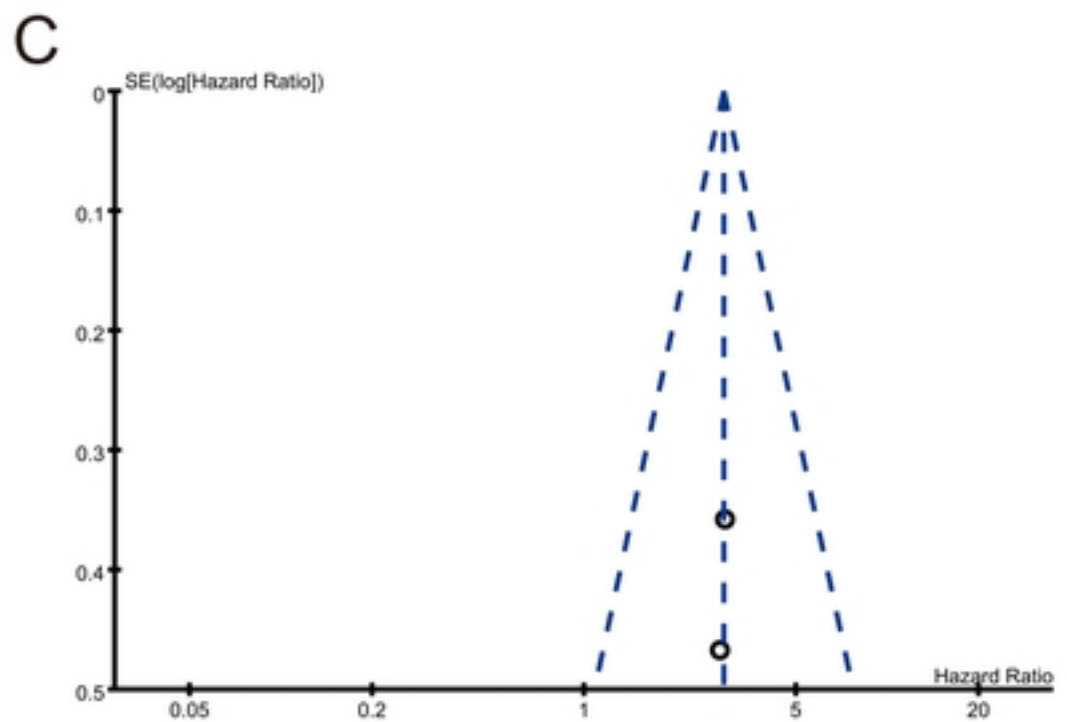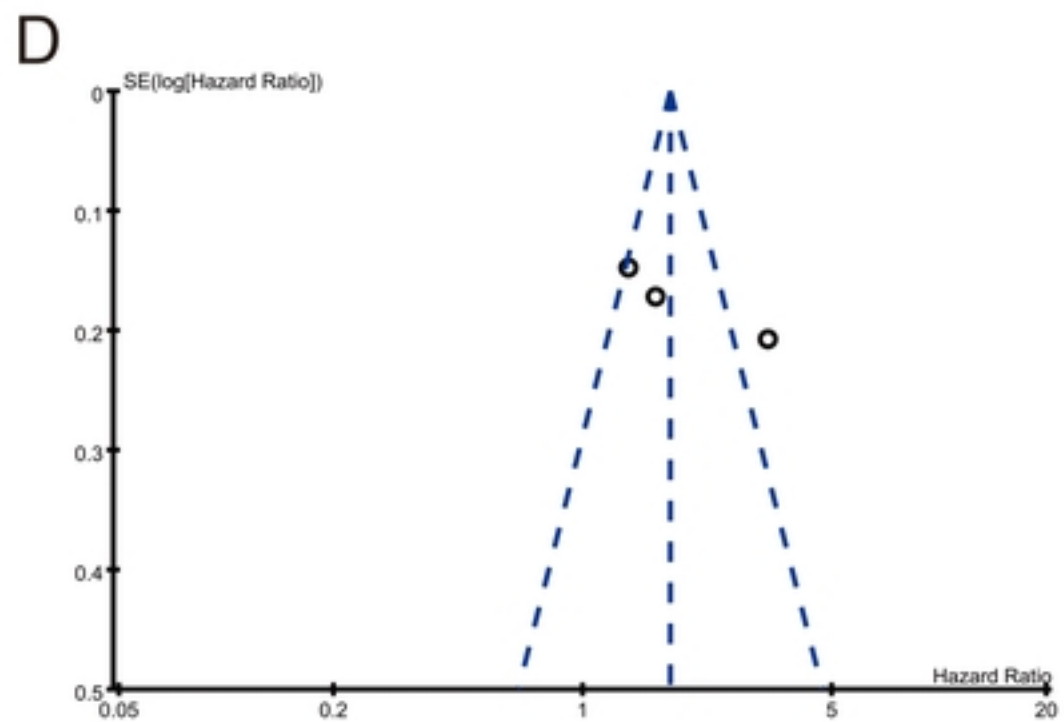

Fig5Funnel plots of included studies evaluating the association b
